# Supplementary material
Source: PubMed Central journal article supplement (PMC3412067)

Supporting information

**Synthesis and evaluation of aryl-naloxamide opiate analgesics targeting truncated exon  
11-associated mu opioid receptor (MOR-1) splice variants**

Susruta Majumdar, Joan Subrath, Valerie Le Rouzic, Lisa Polikar, Maxim Burgman,  
Kuni Nagakura, Julie Ocampo, Nathan Haselton, Anna R. Pasternak, Steven Grinnell and

Gavril W. Pasternak

Department of Neurology

and

Molecular Pharmacology and Chemistry Program

Memorial Sloan-Kettering Cancer Center,

New York, NY 10065.

**HPLC data on compounds 15-38.**

**Instrument:** Waters 1525 Binary HPLC pump  
Waters 2484 UV-Vis detector

**Column:** Waters Xbridge, C18 5  $\mu$ m x 150 x 4.6 mm,  
S/N 013630221140.

**Mobile phase:** 0.1%TFA in water/0.1%TFA in ACN

**Flow rate:** 1.0 mL/min.

Compound 15

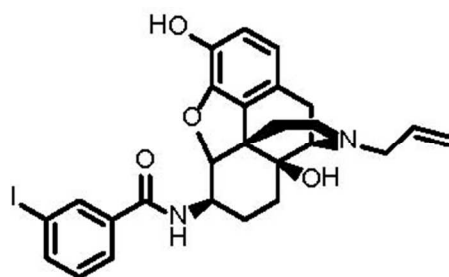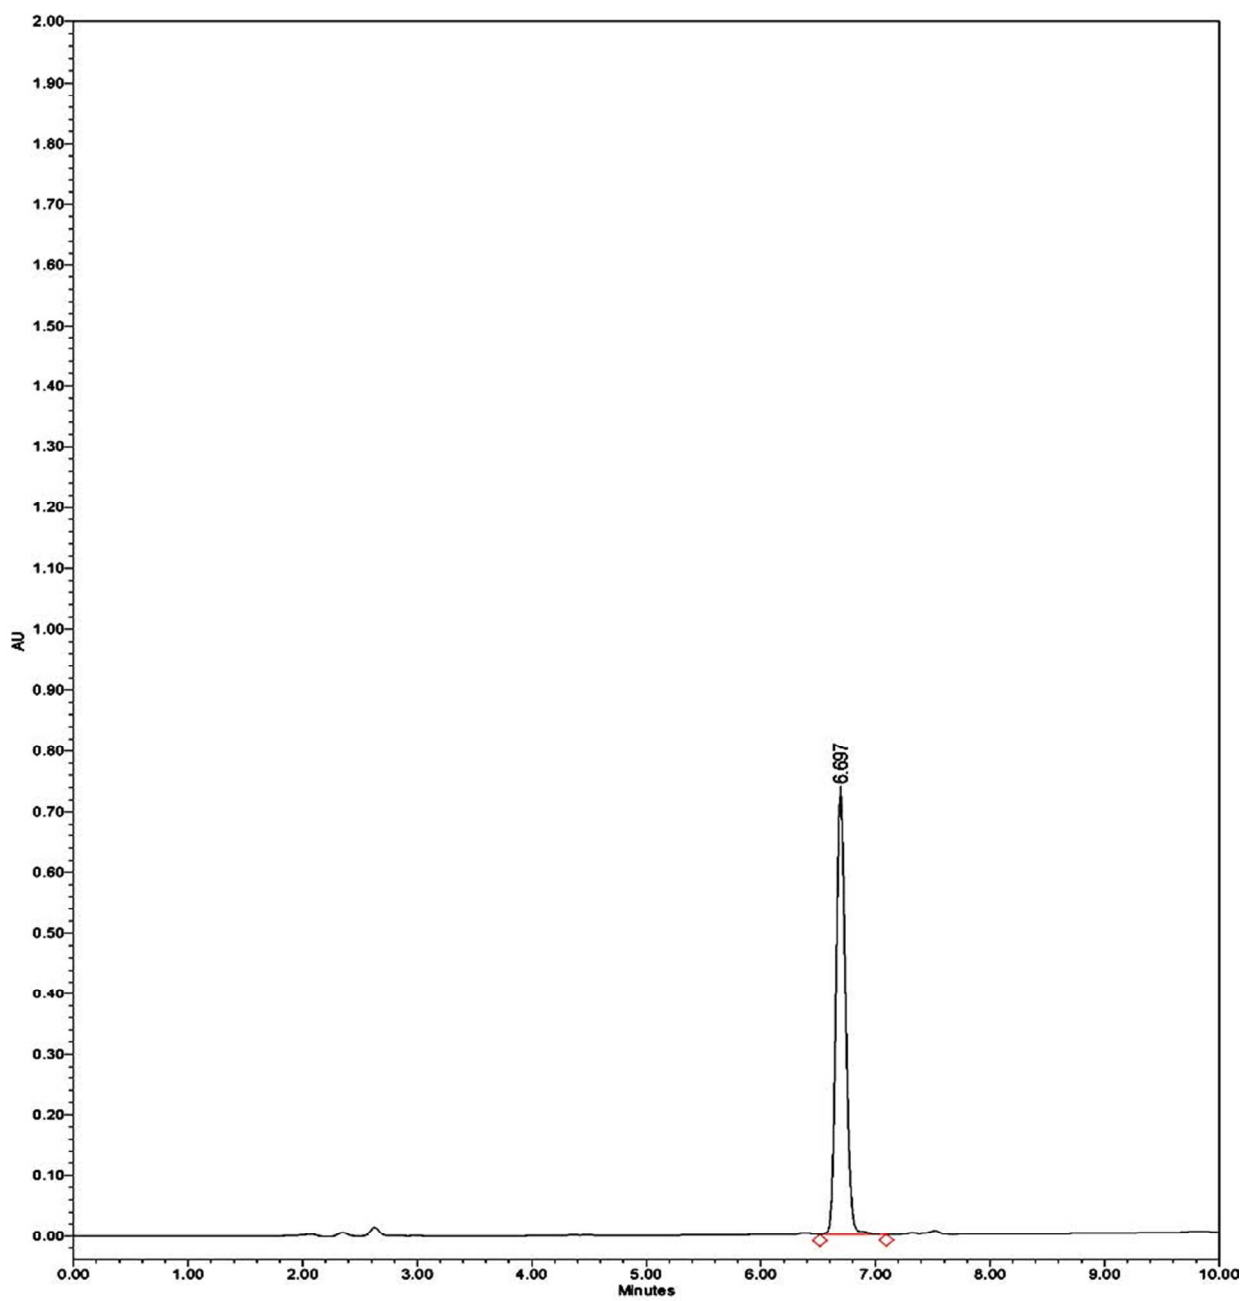

Compound 16

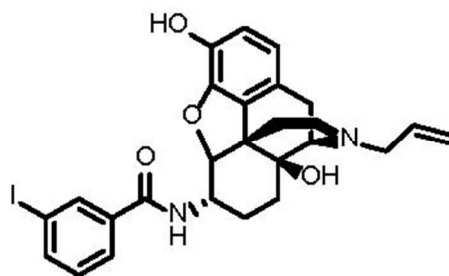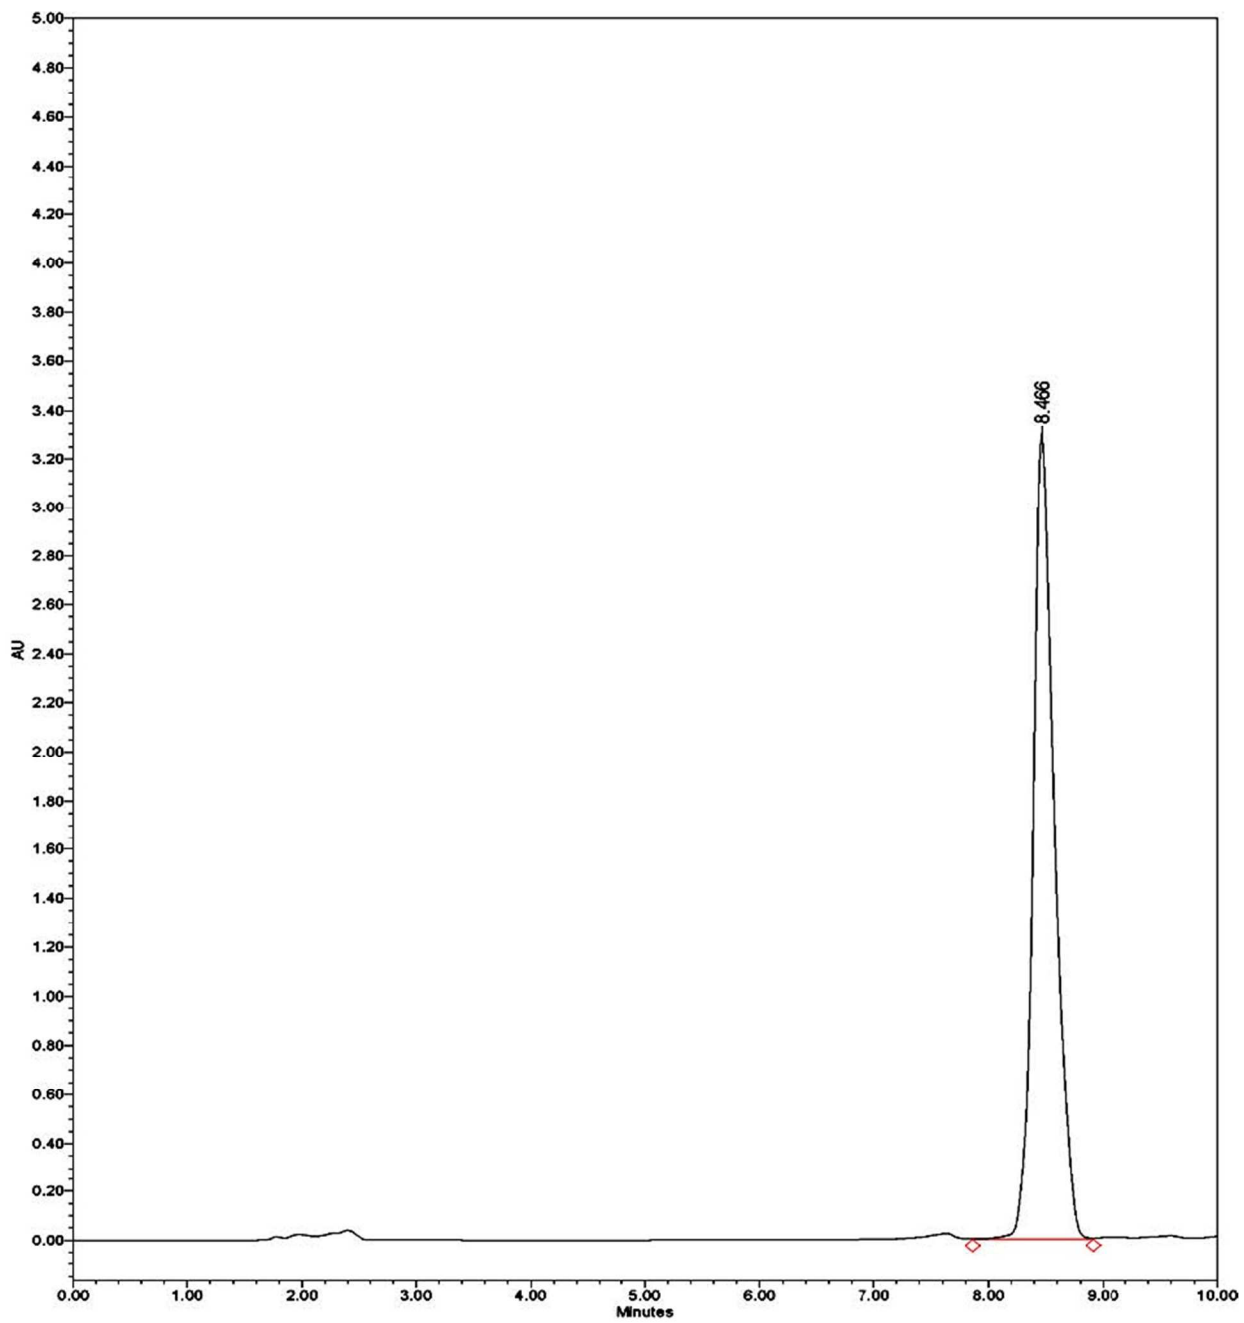

Compound 17

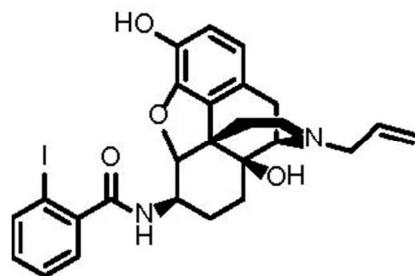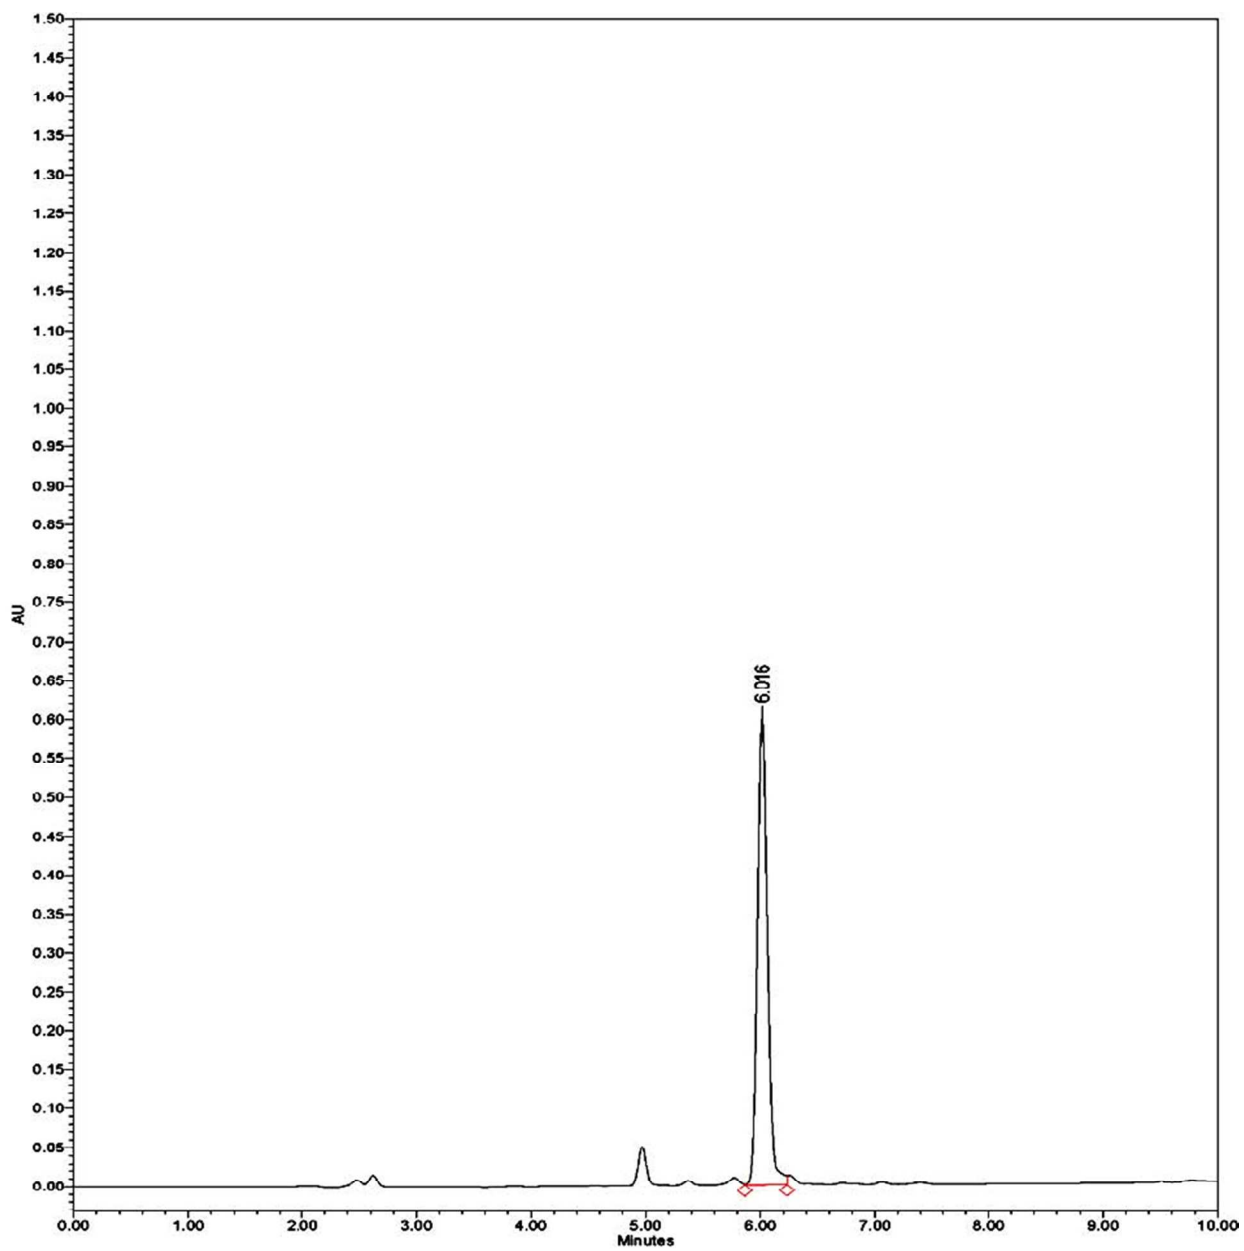

Purity: 92%

Compound 18

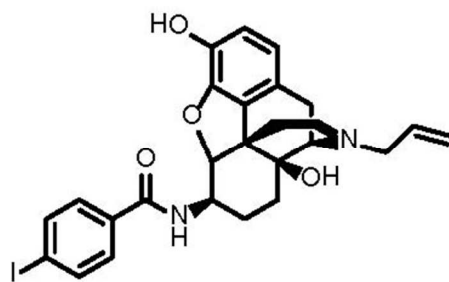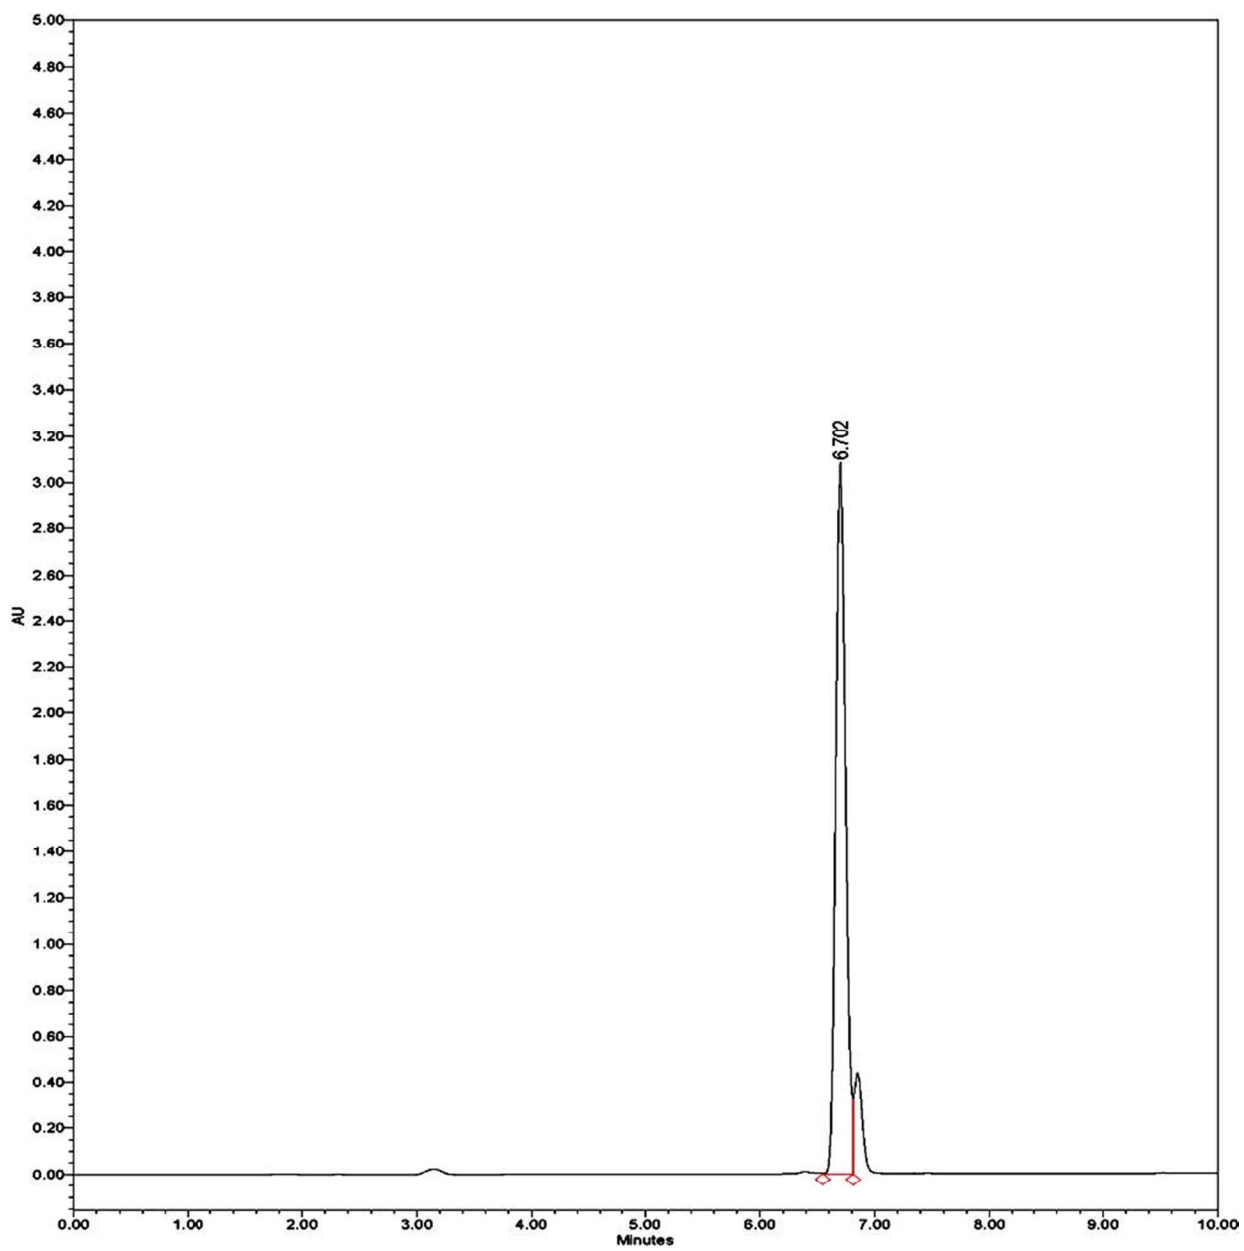

Purity: 90%      Minor peak:  $\alpha$  isomer ~10%

Compound 19

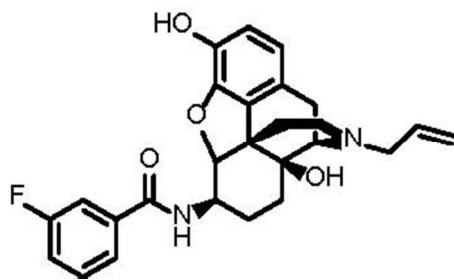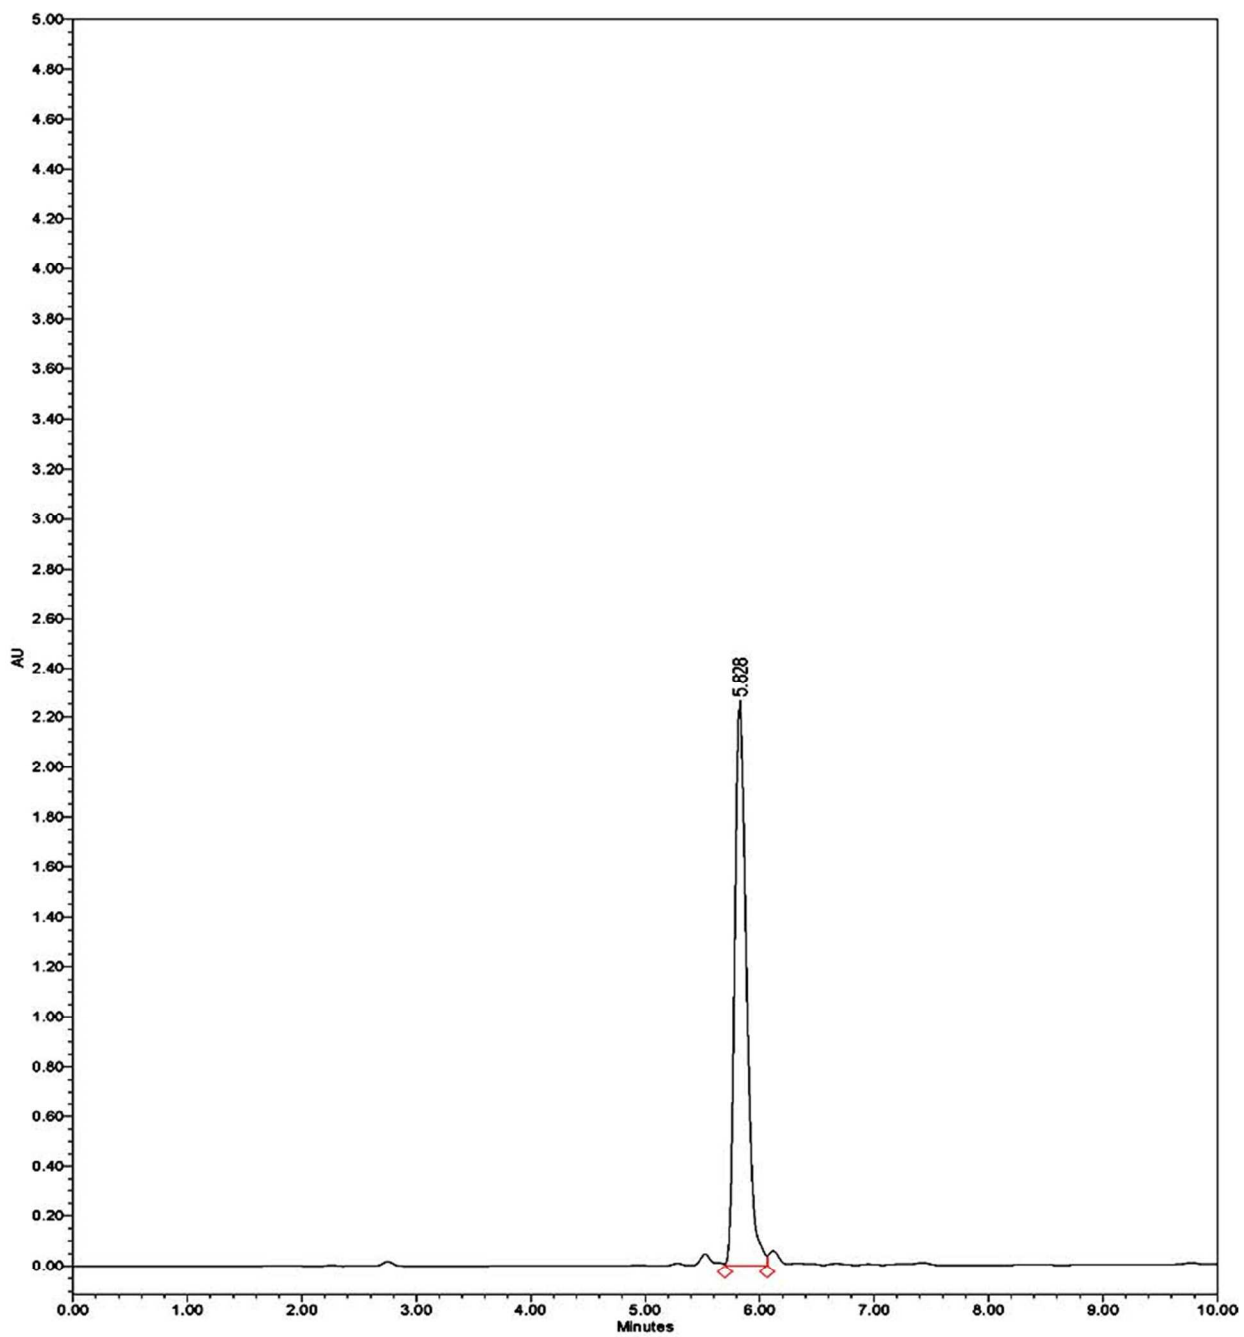

Compound 20

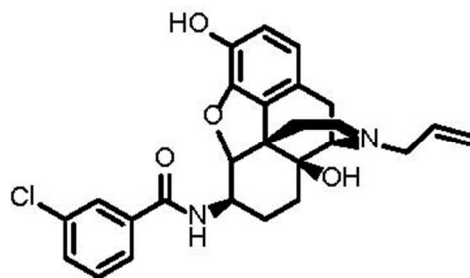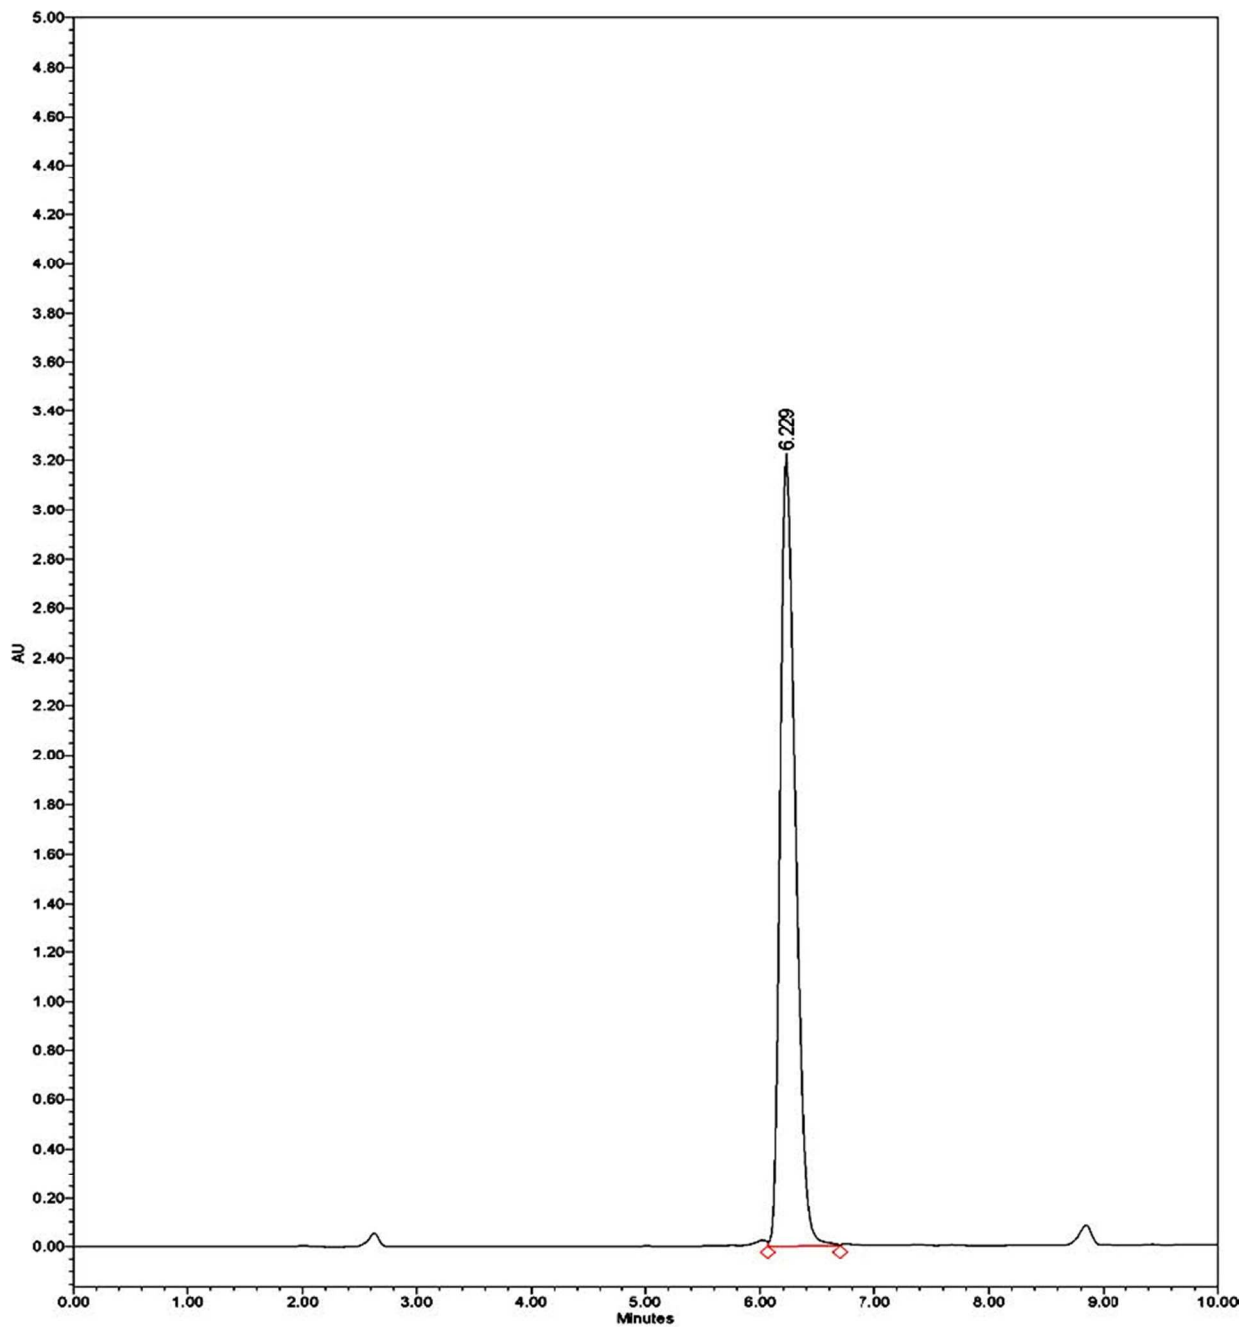

Compound 21

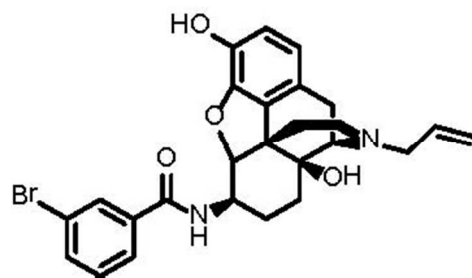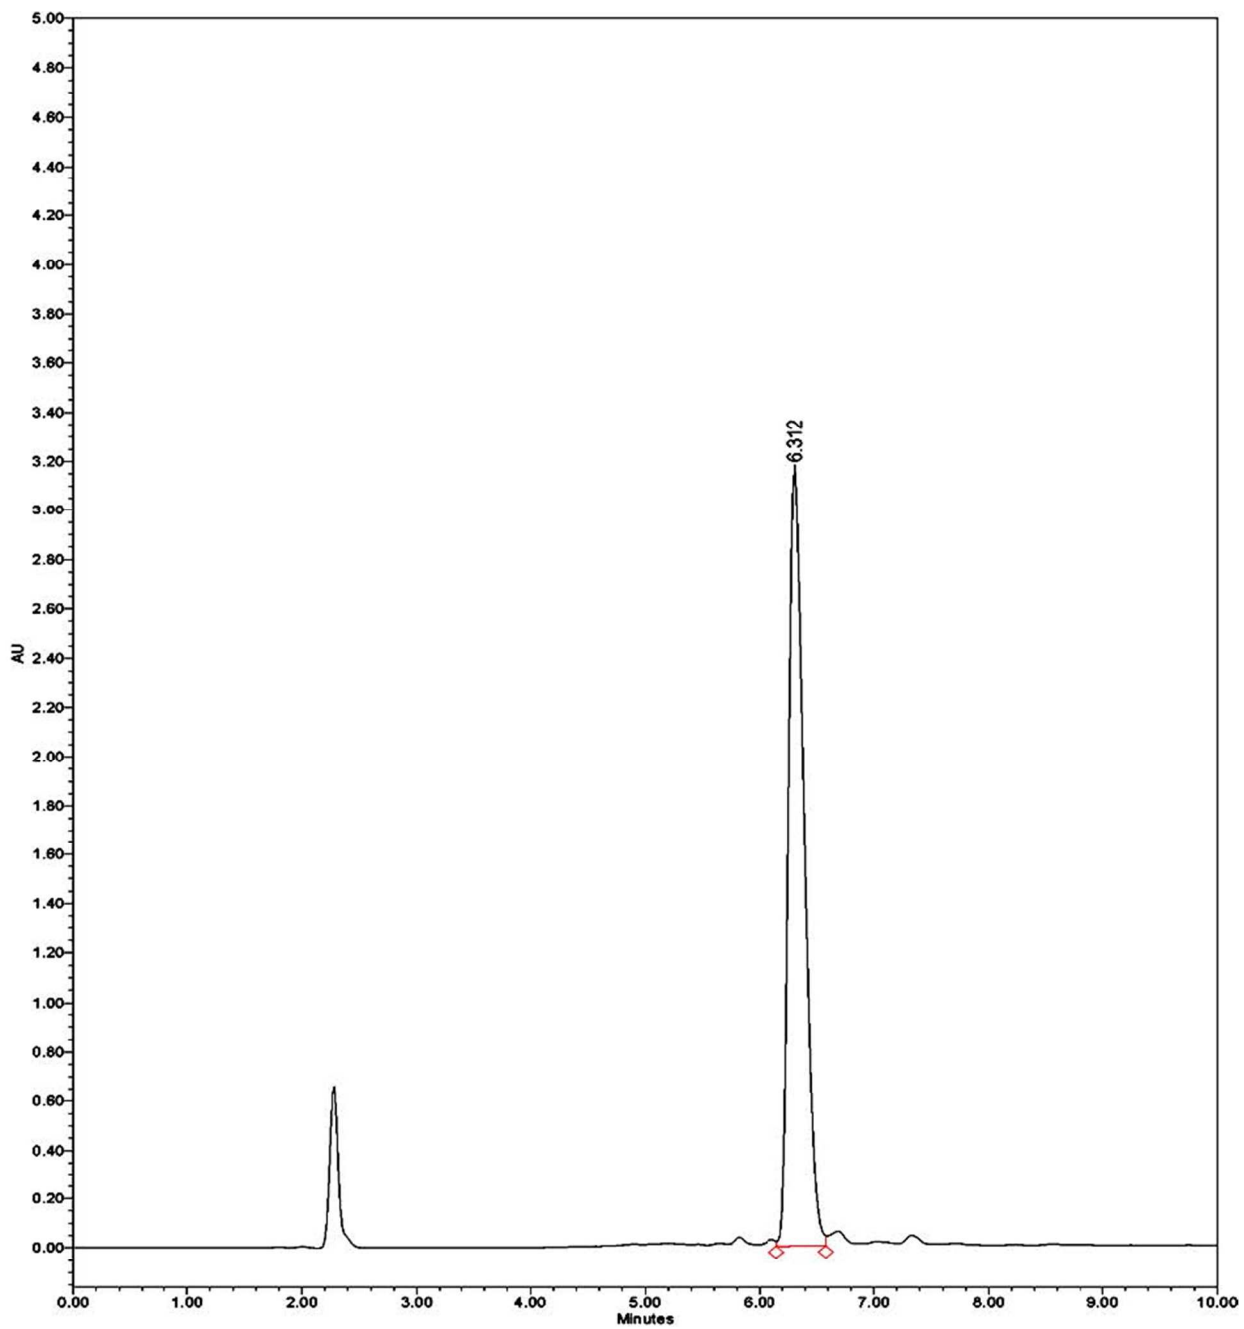



Compound 22

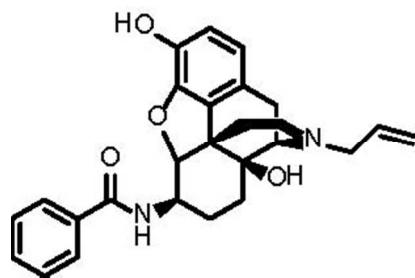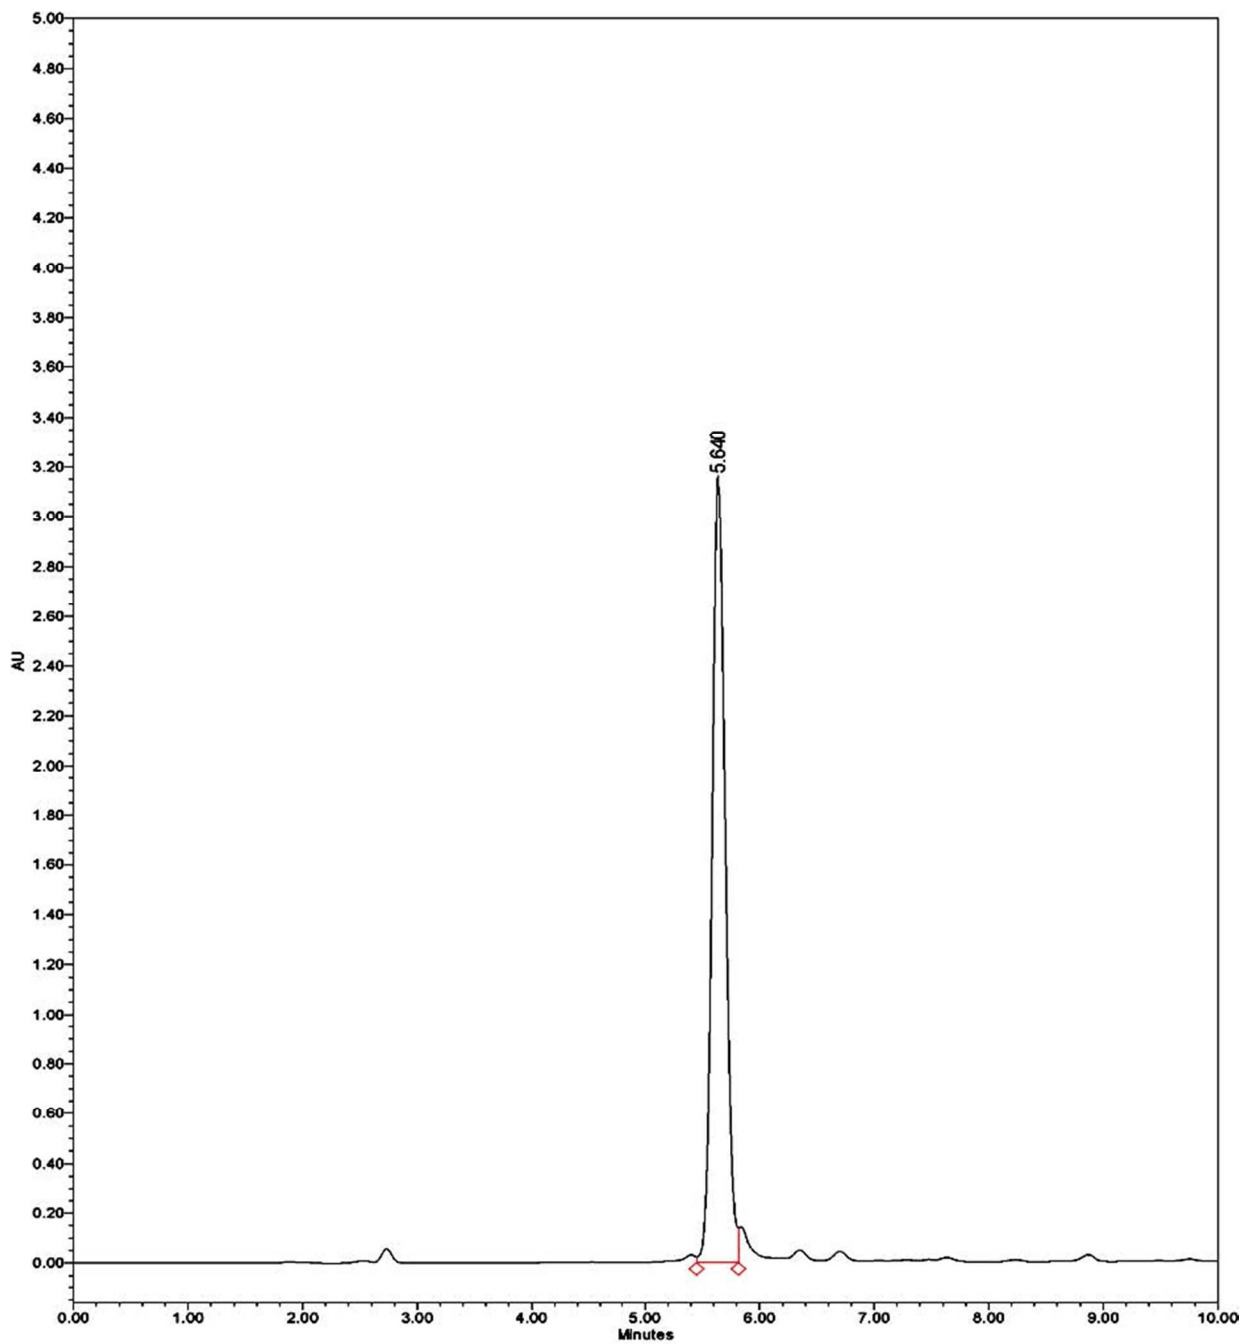

Compound 23

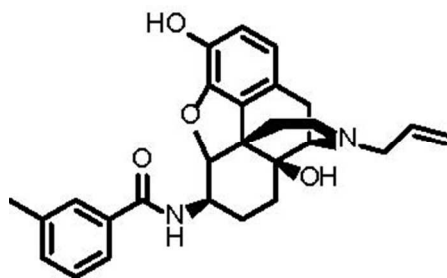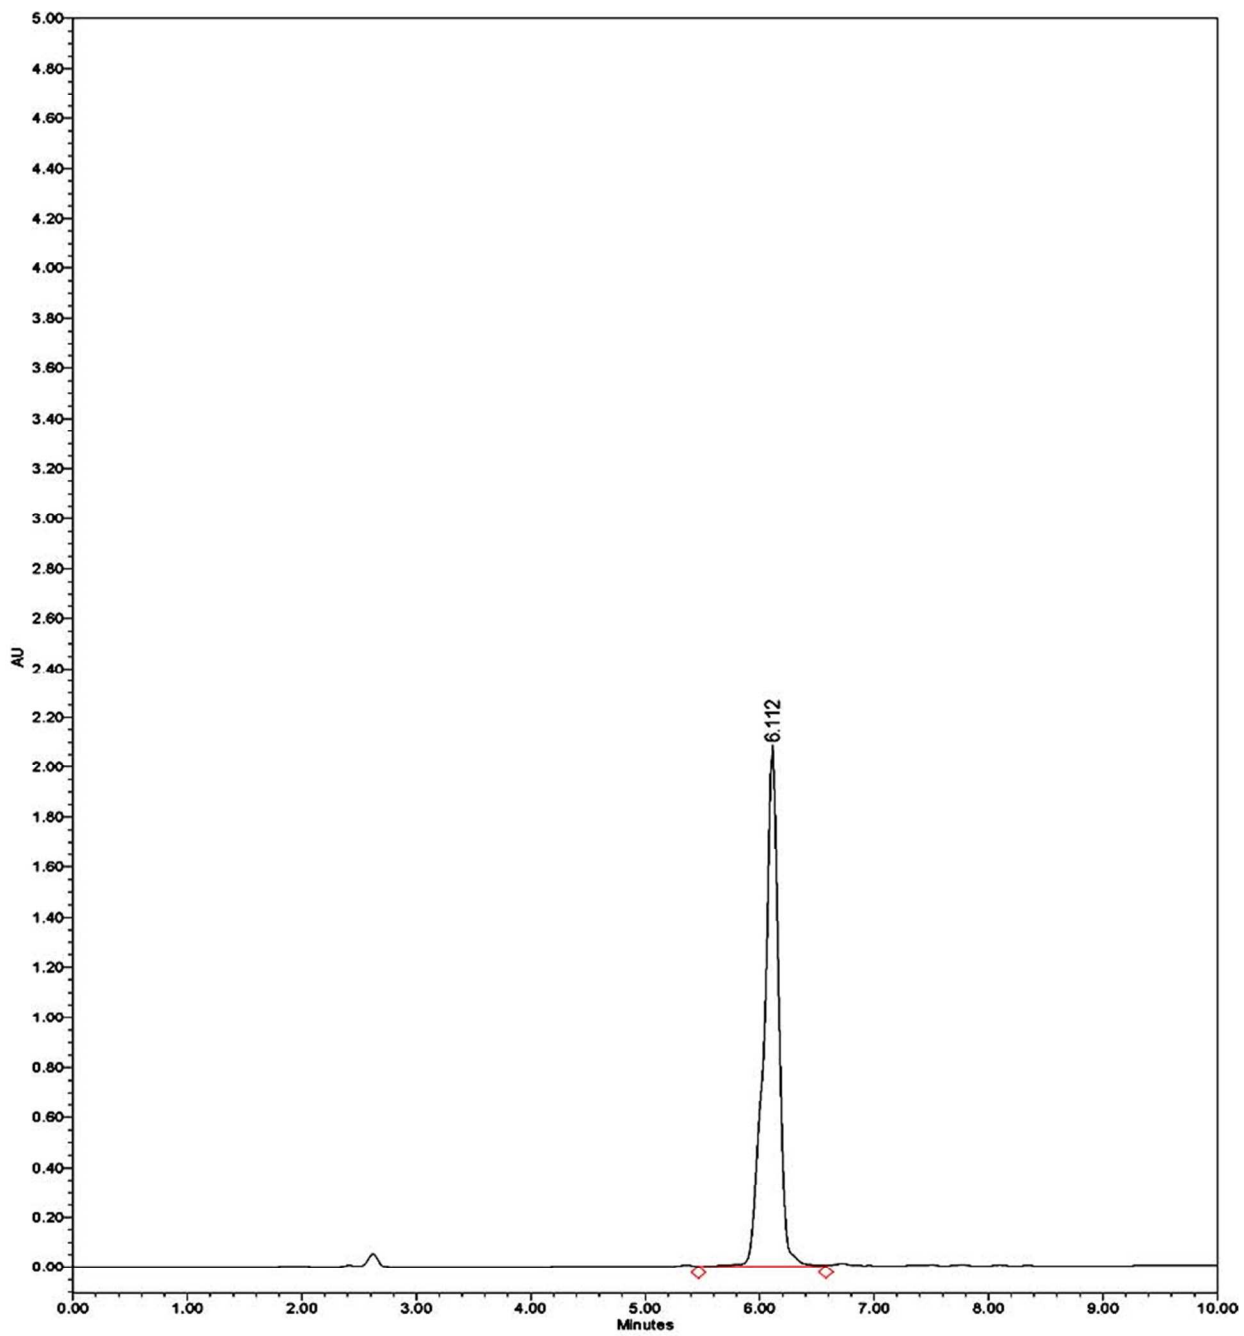

Compound 24

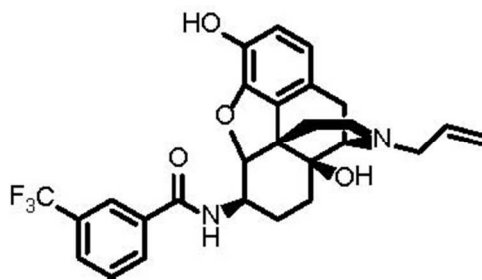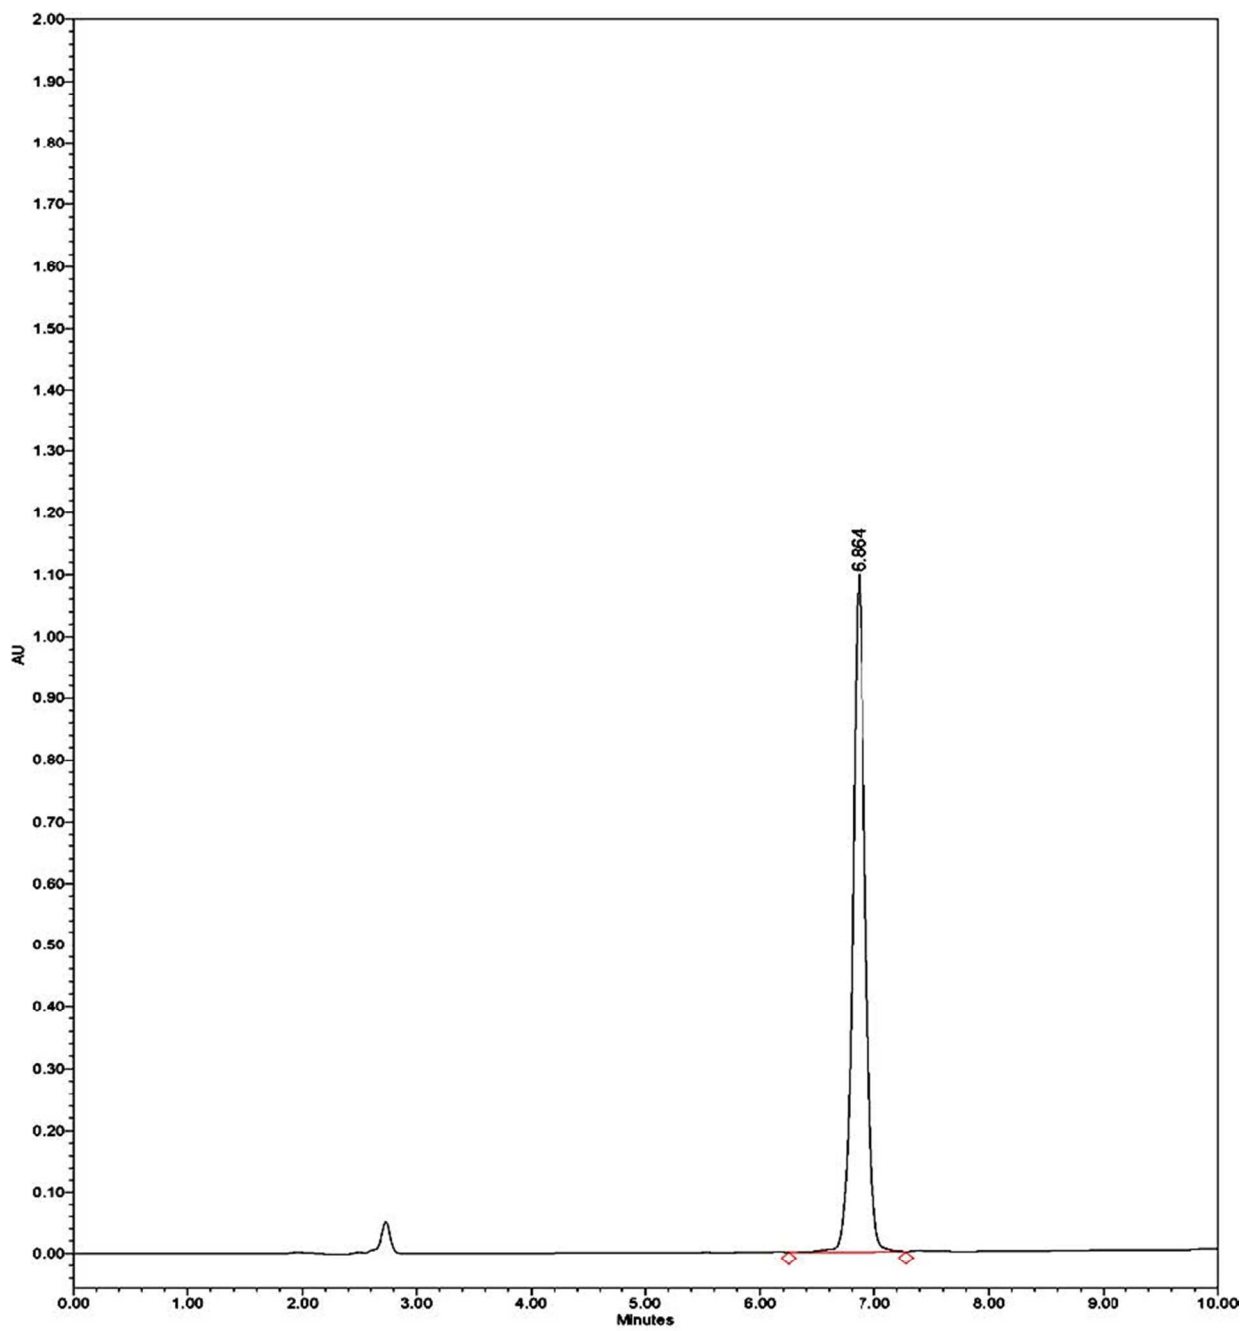

Compound 25

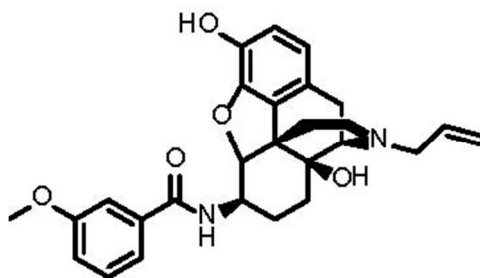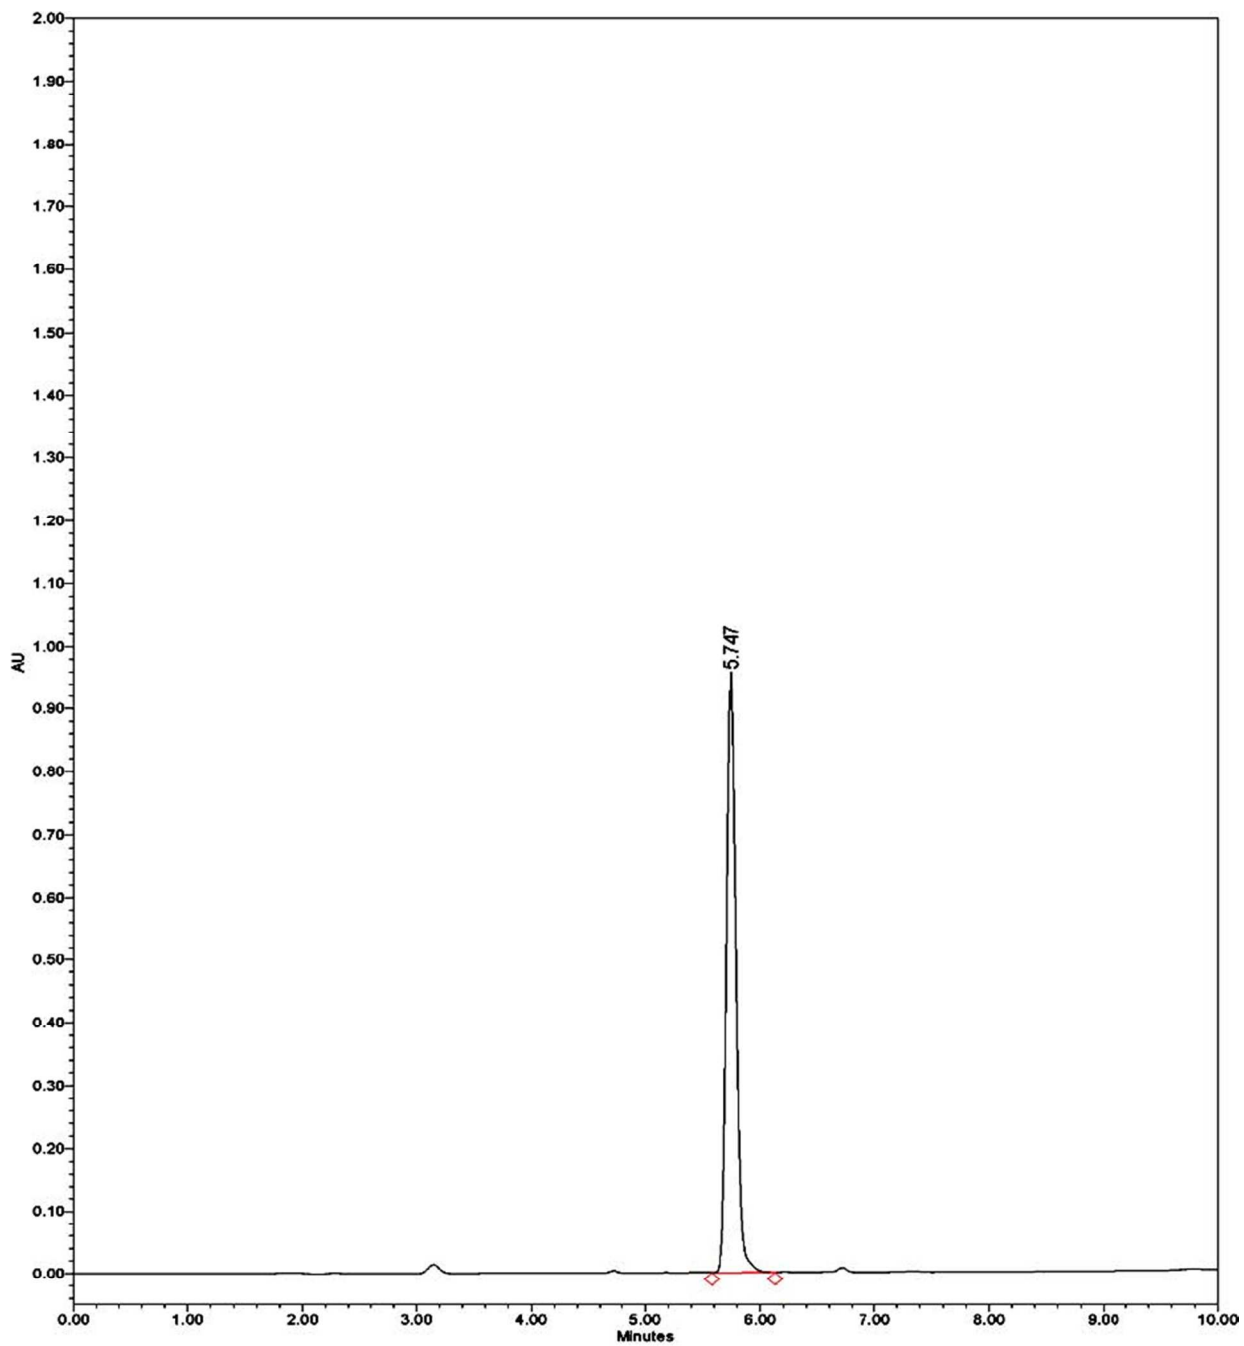

Compound 26

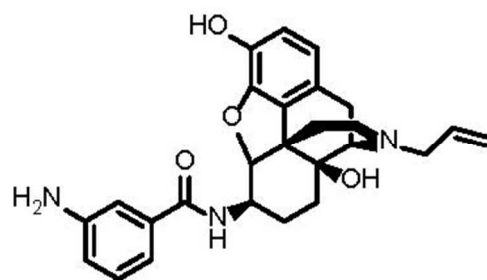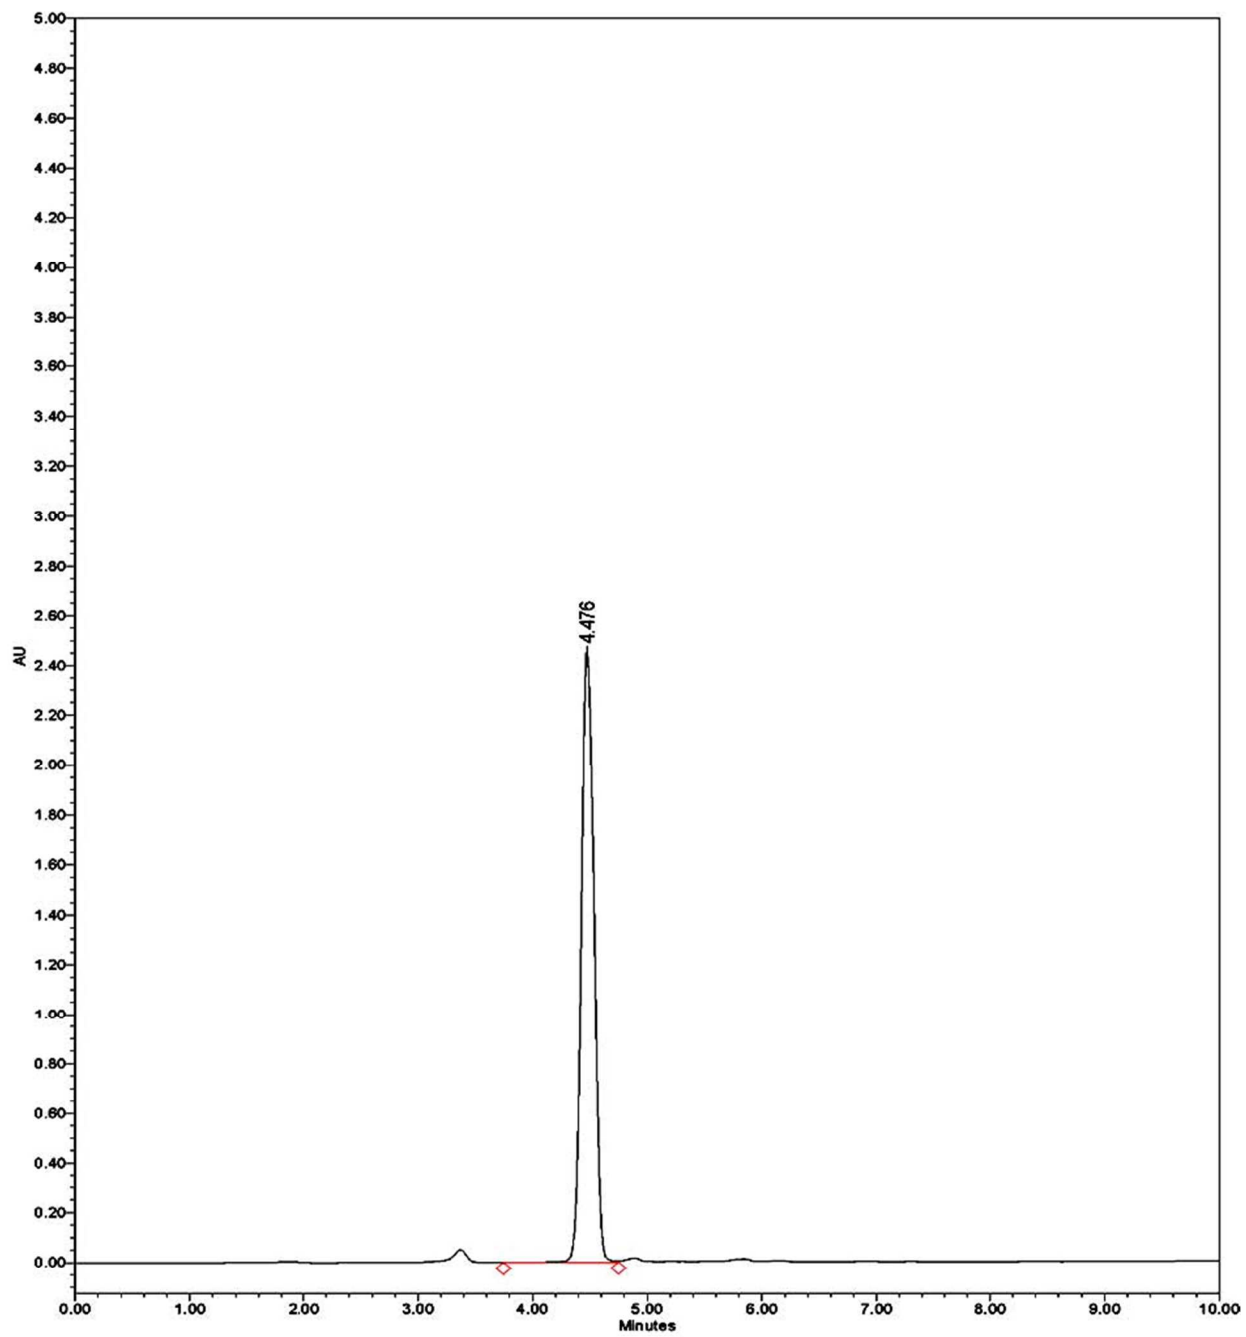

Compound 27

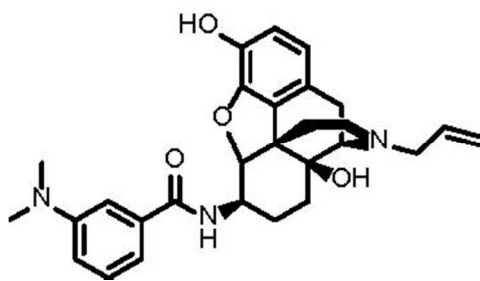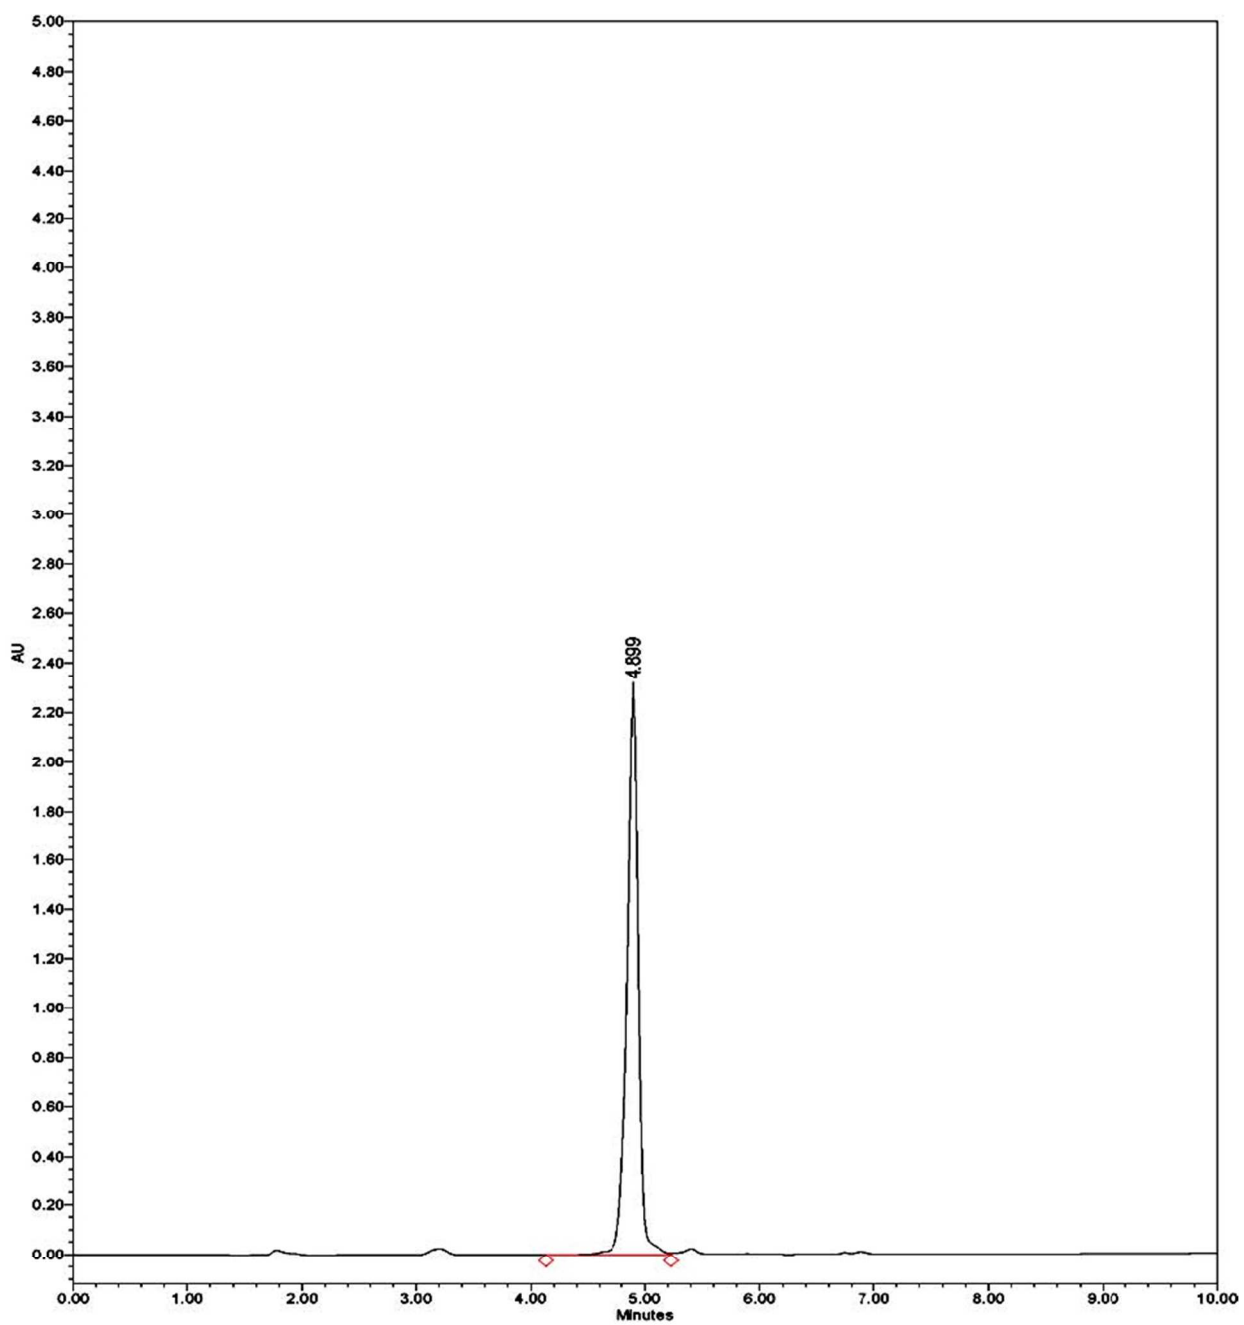

Compound 28

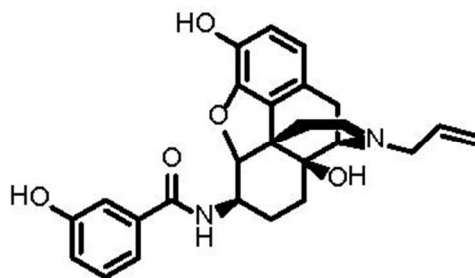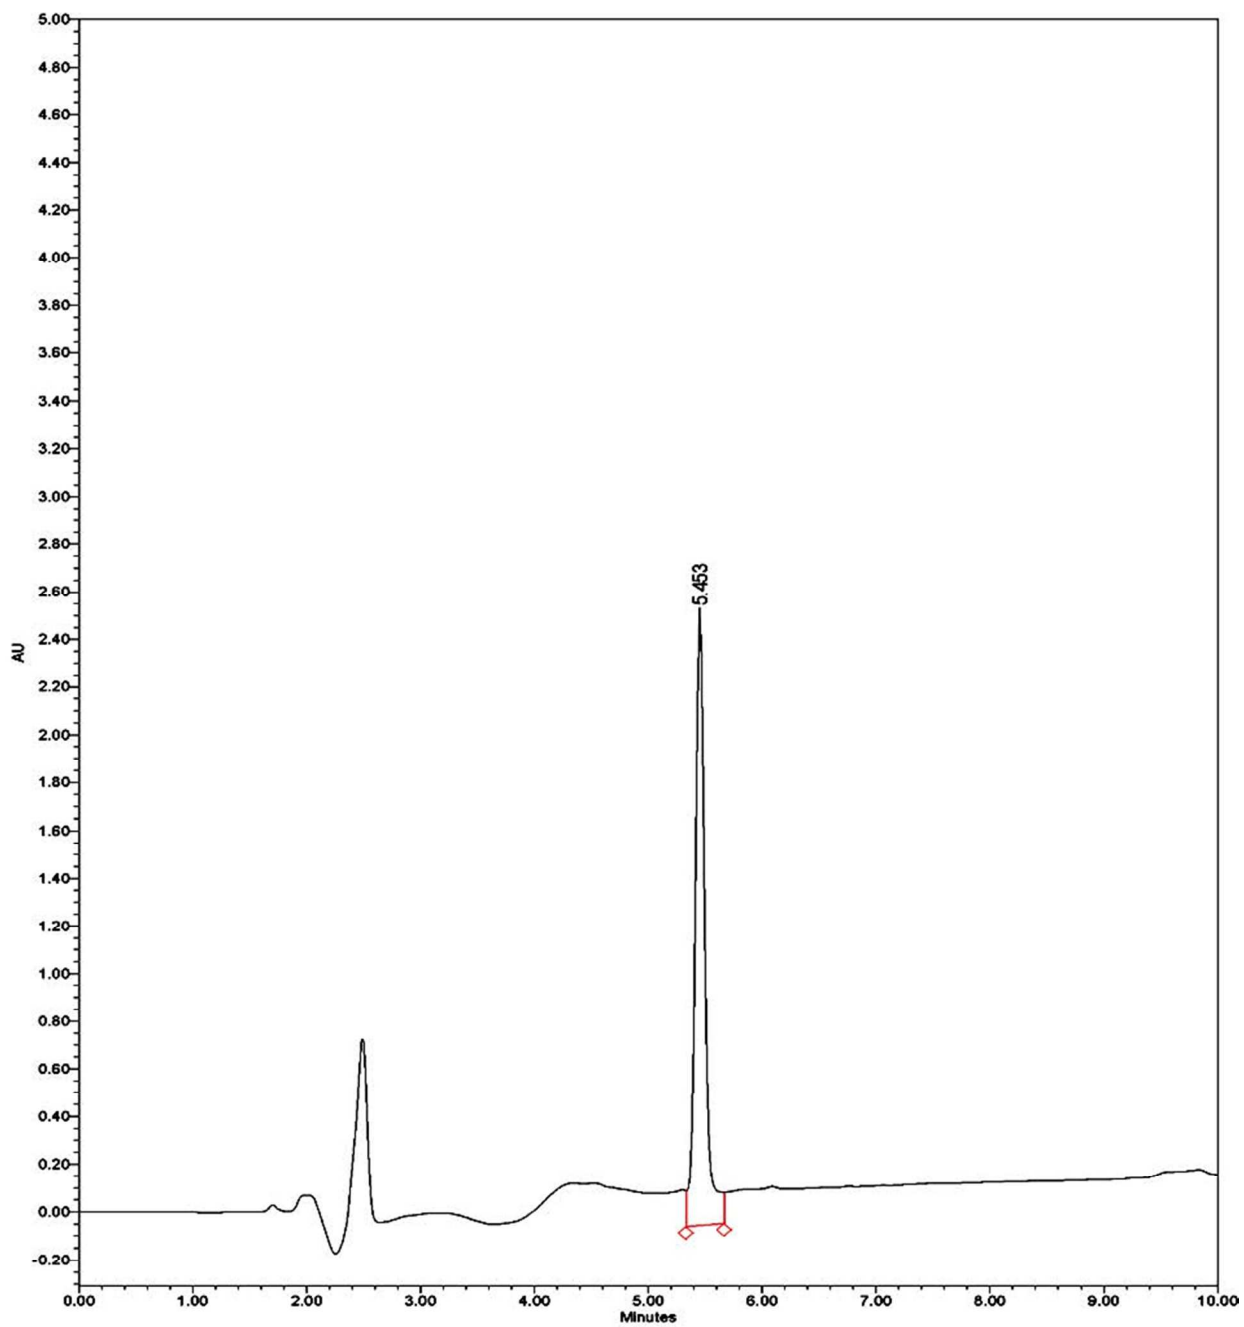

Compound 29

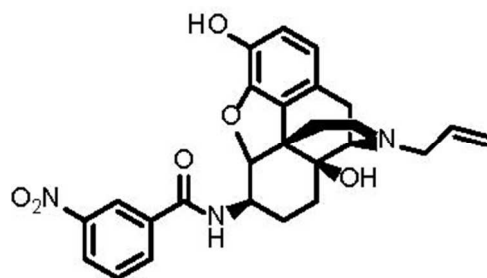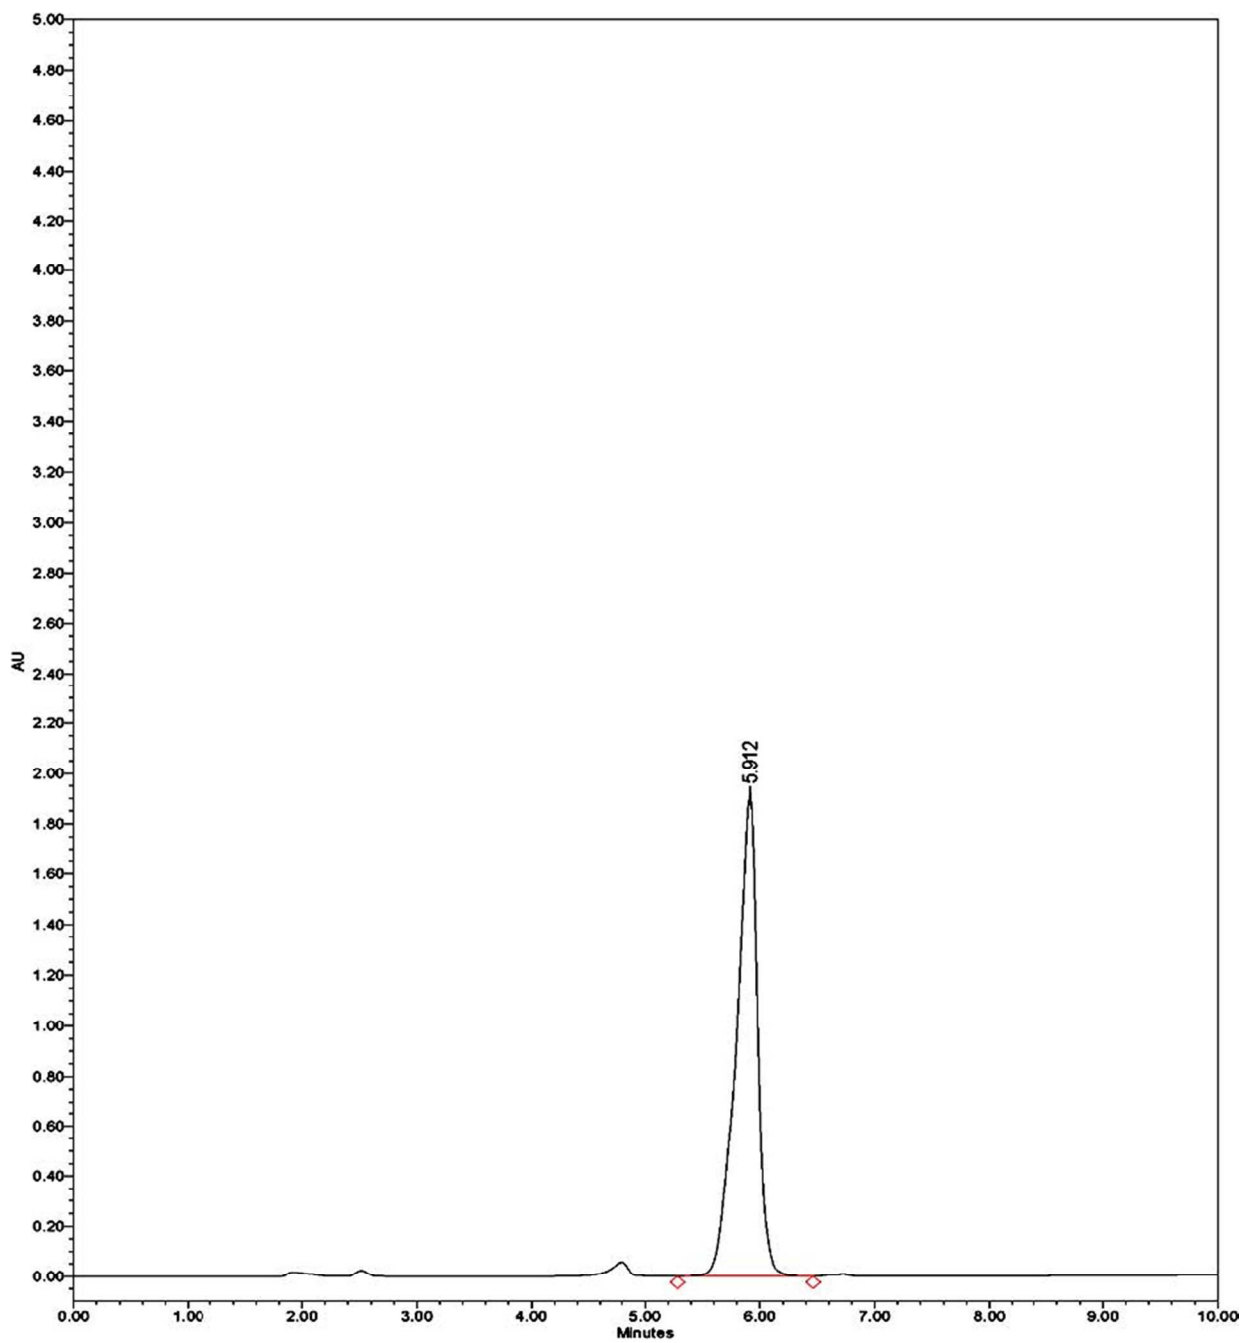



Compound 30

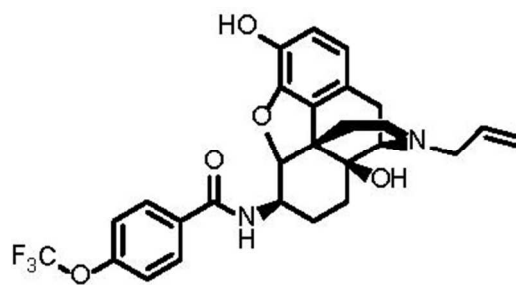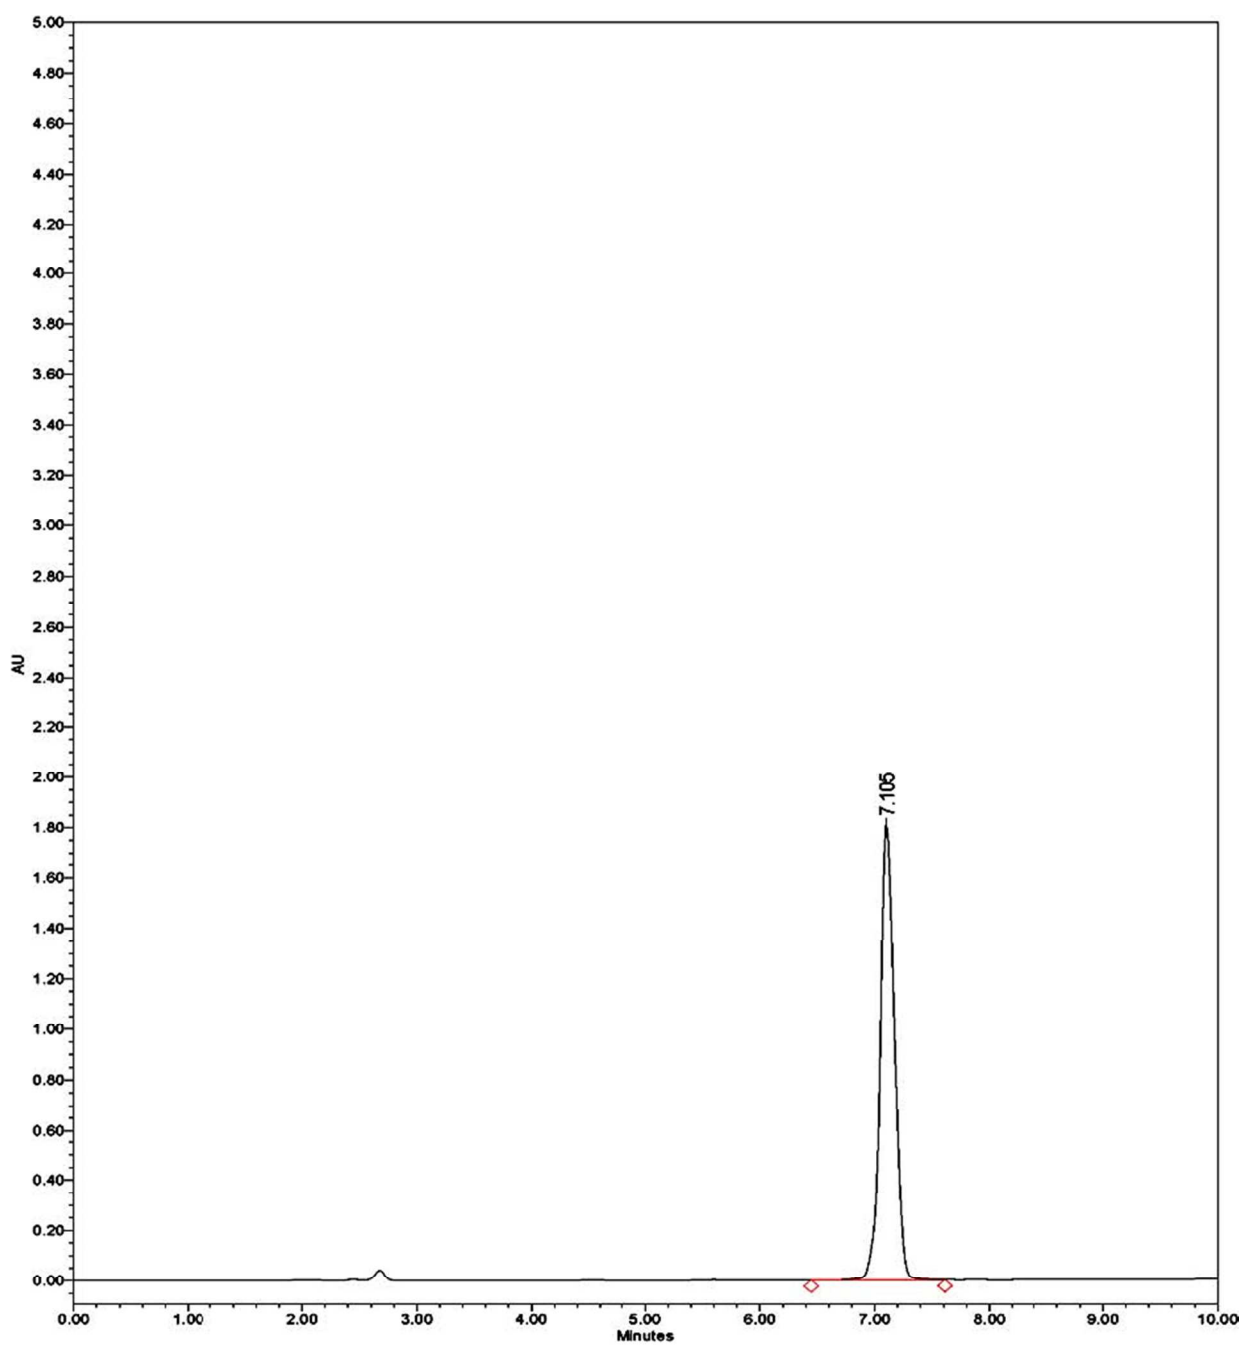

Compound 31

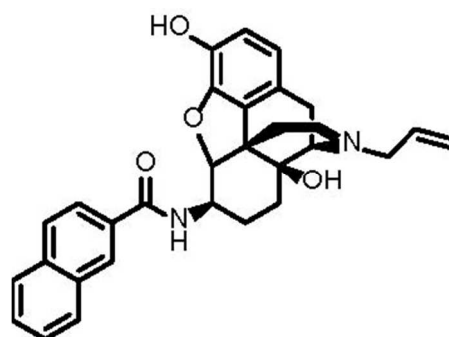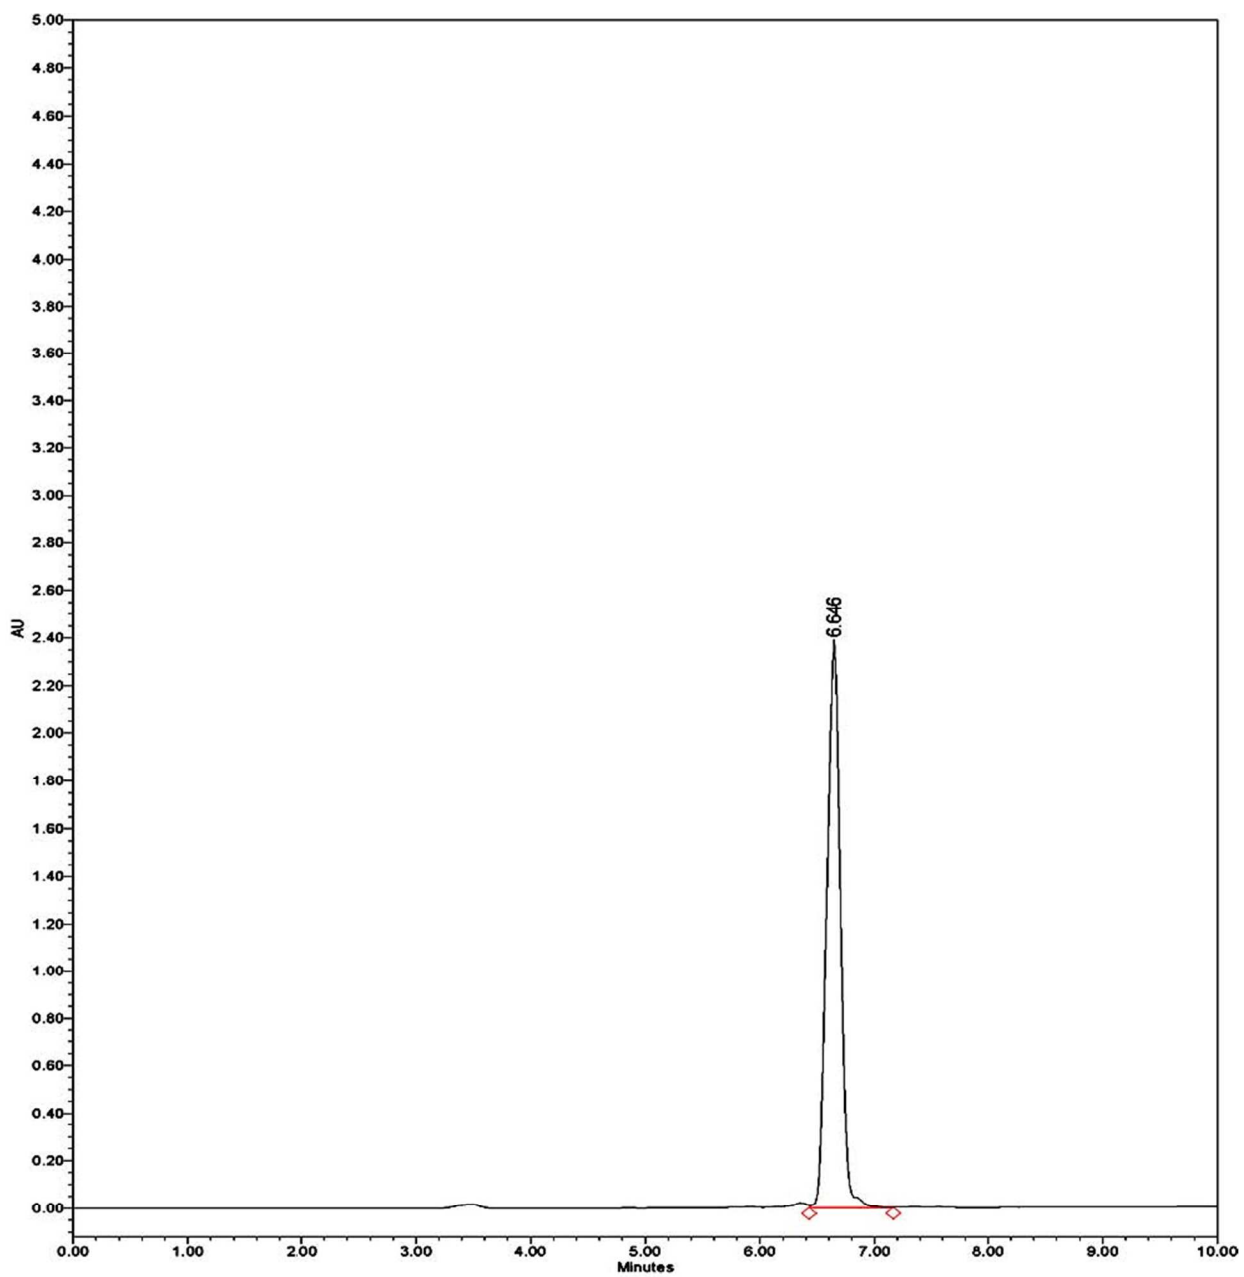

Compound 32

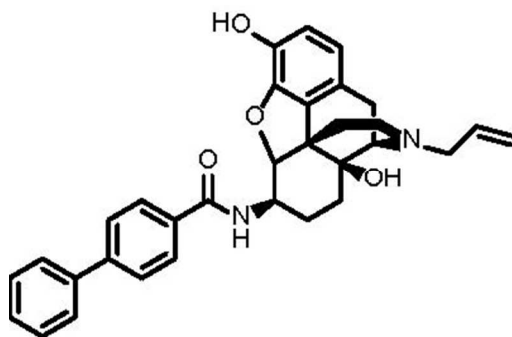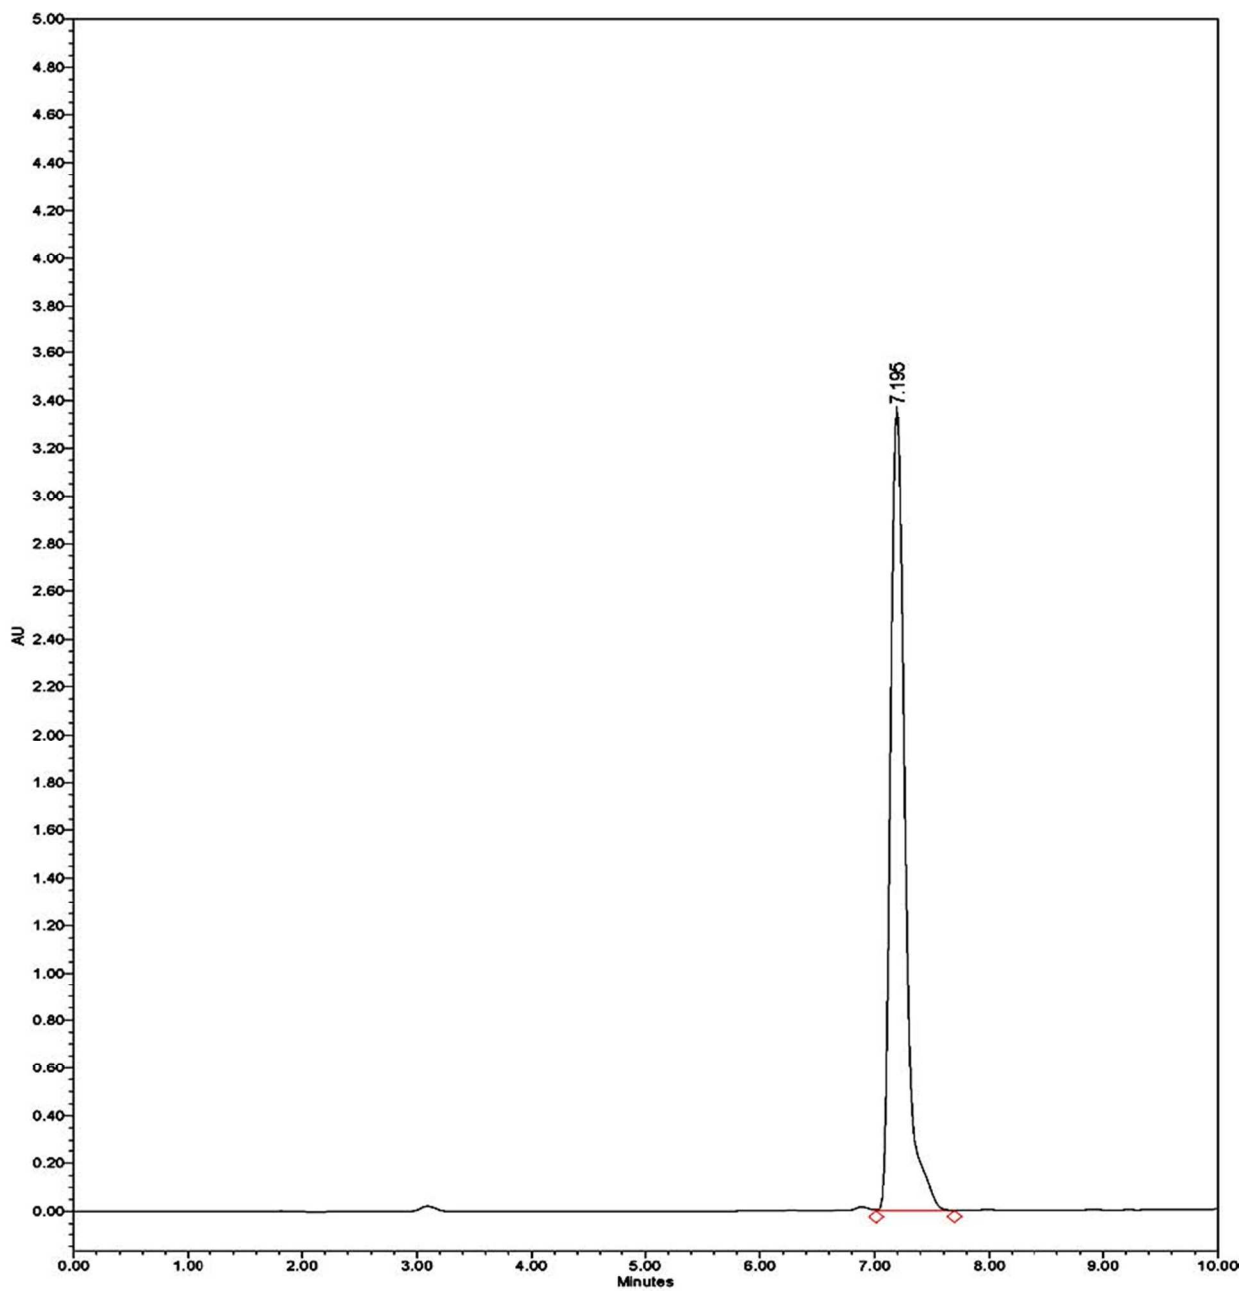

Compound 33

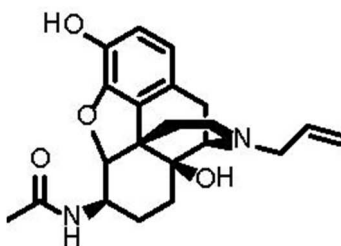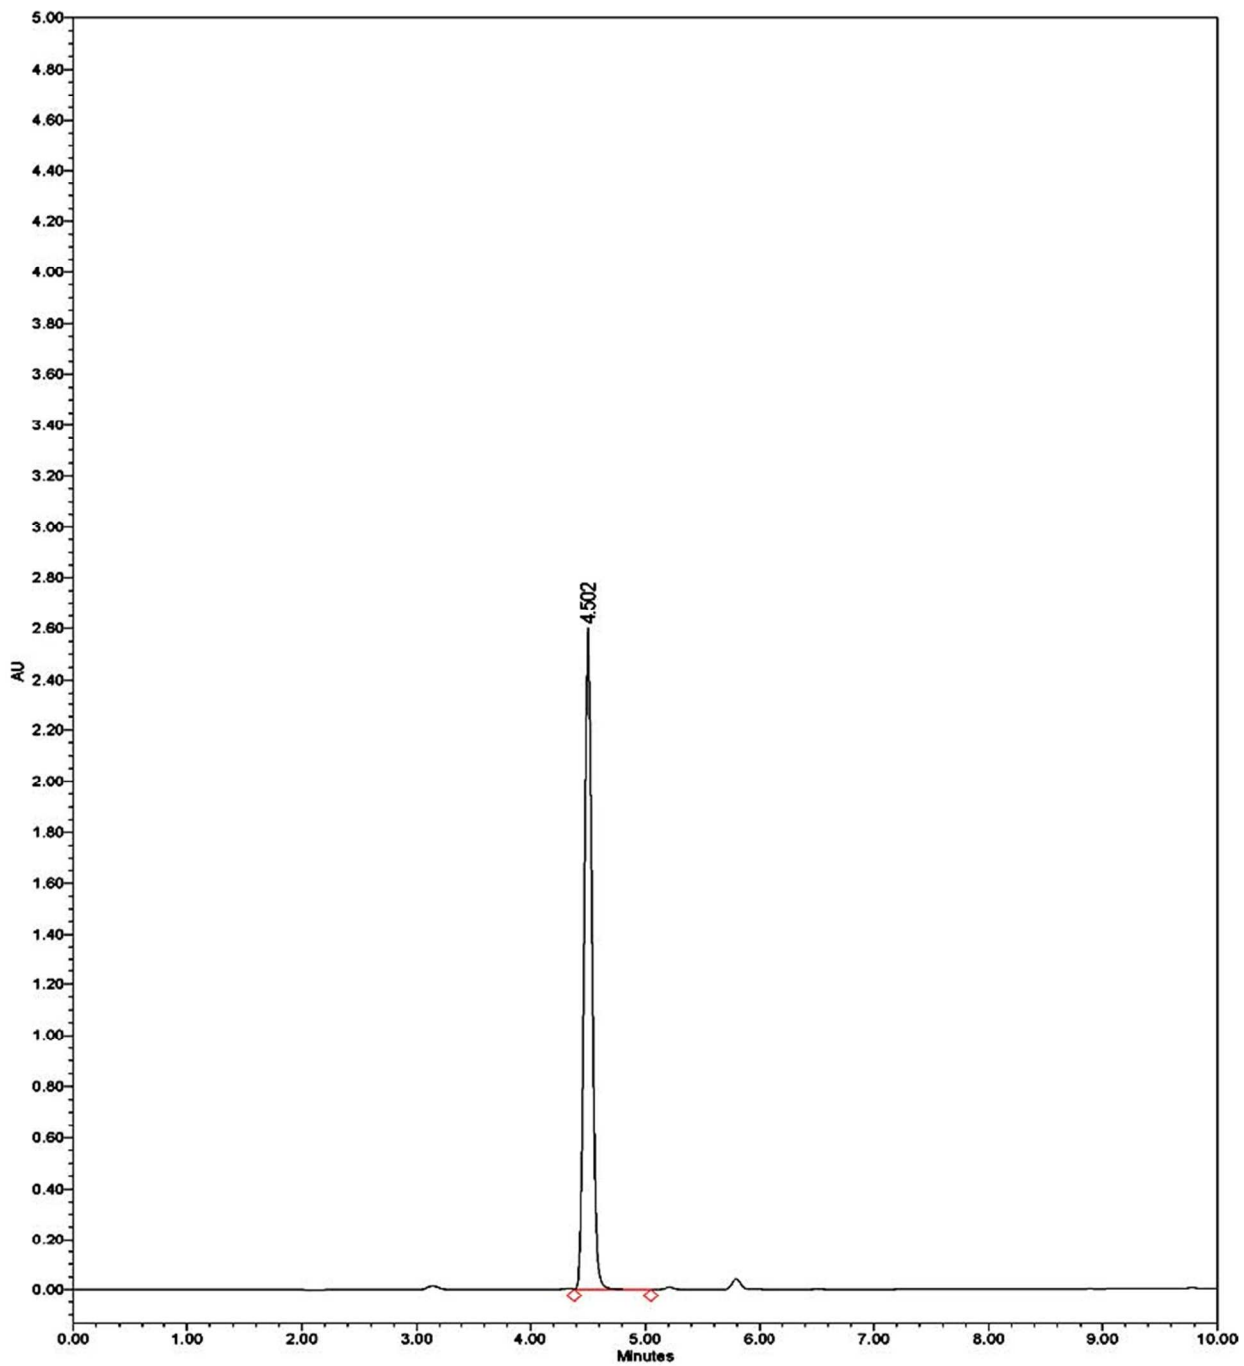

Compound 34

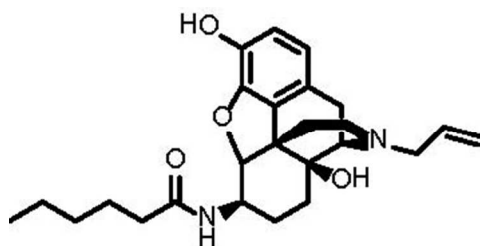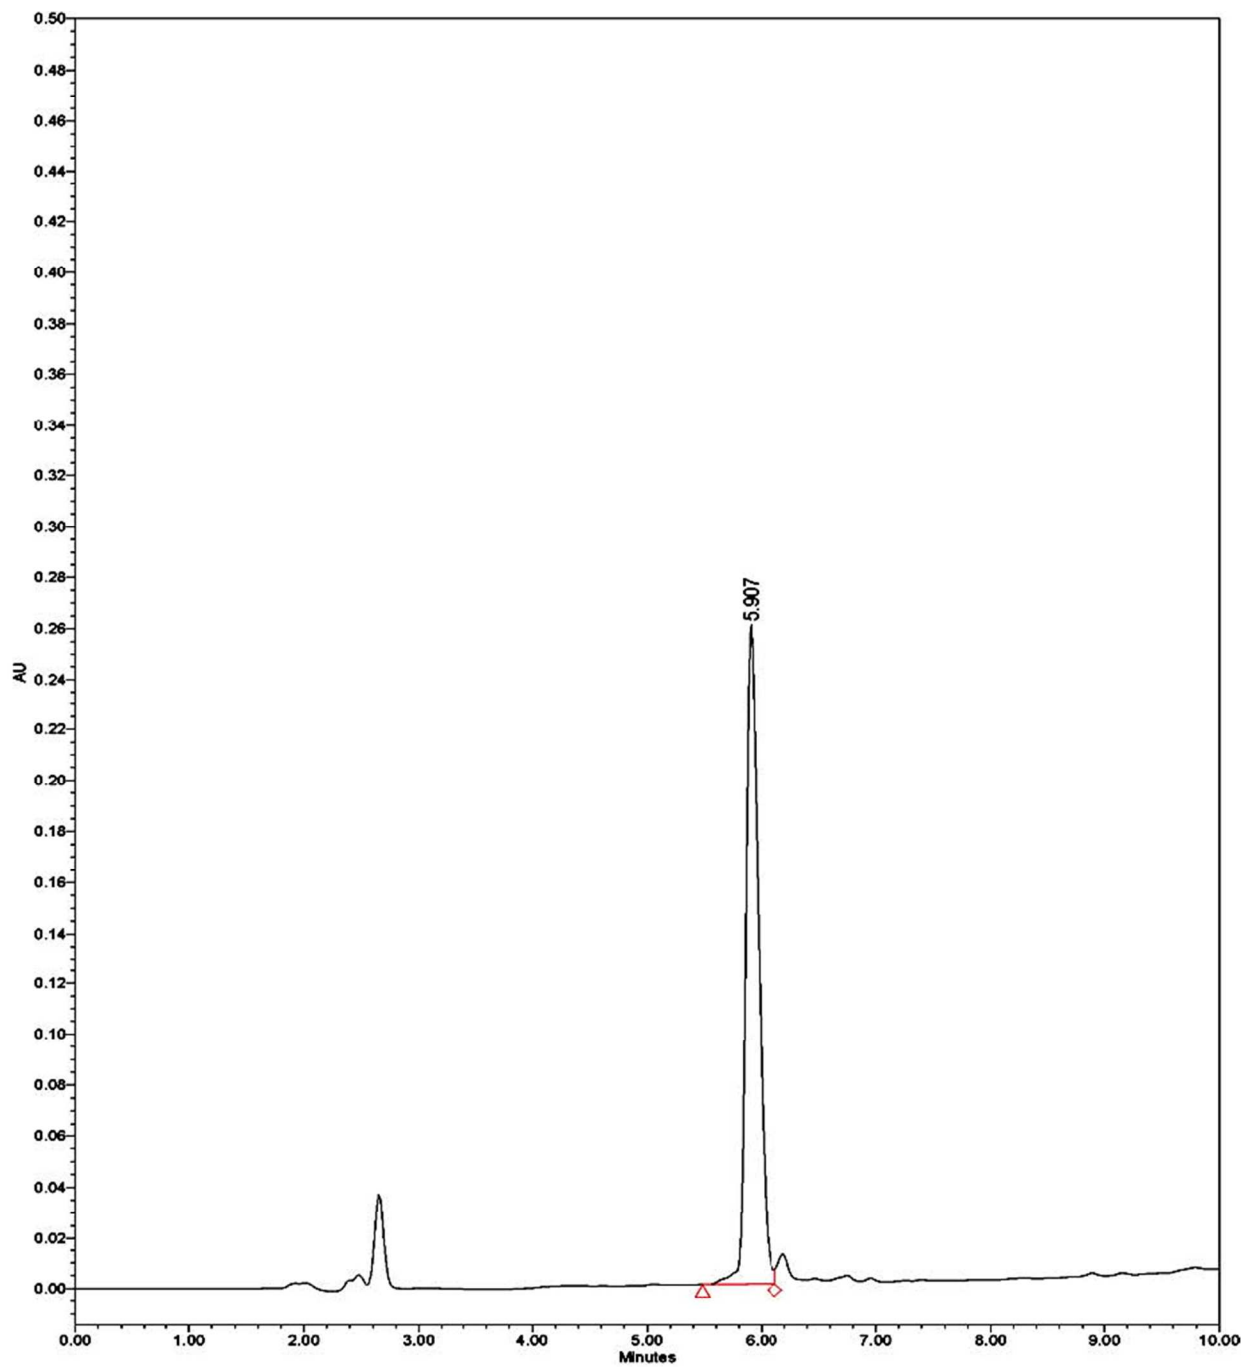

Compound 35

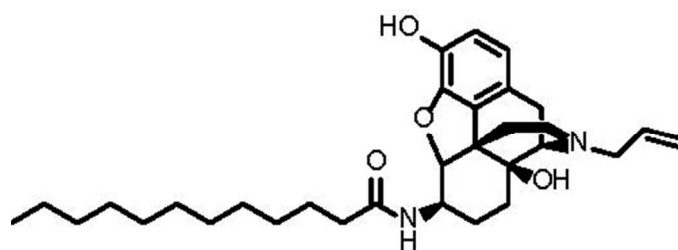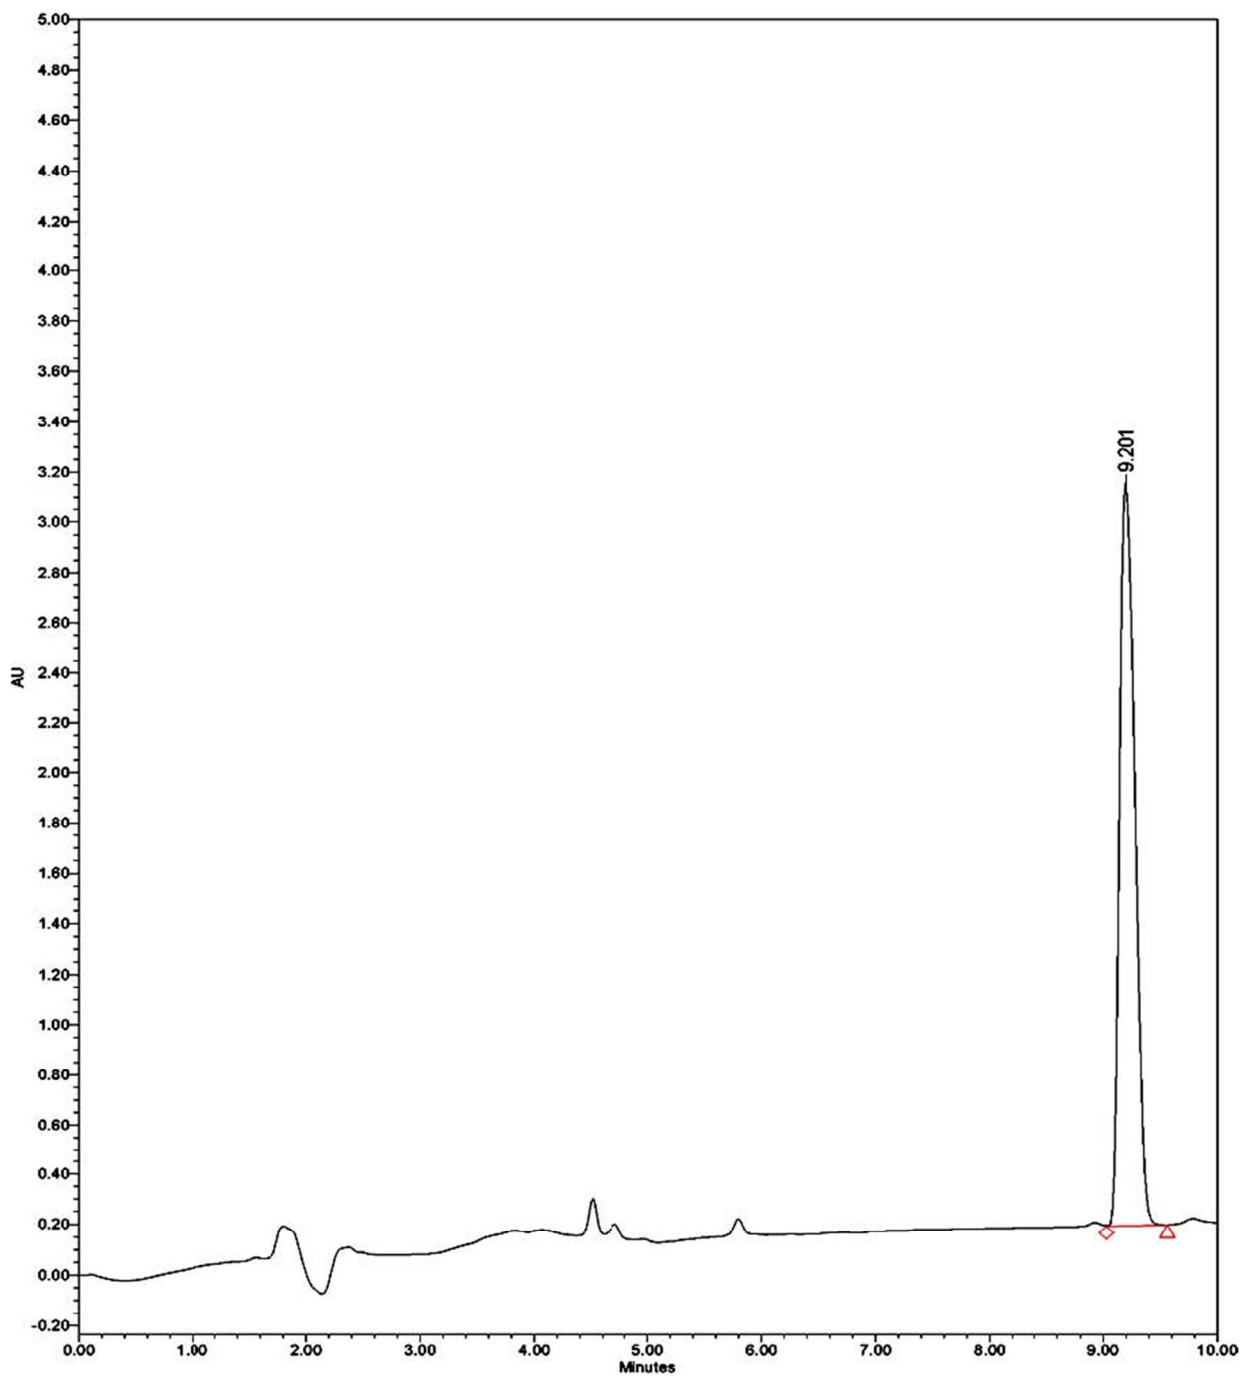

Compound 36

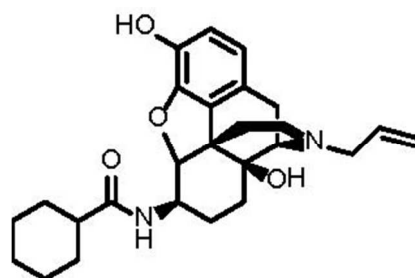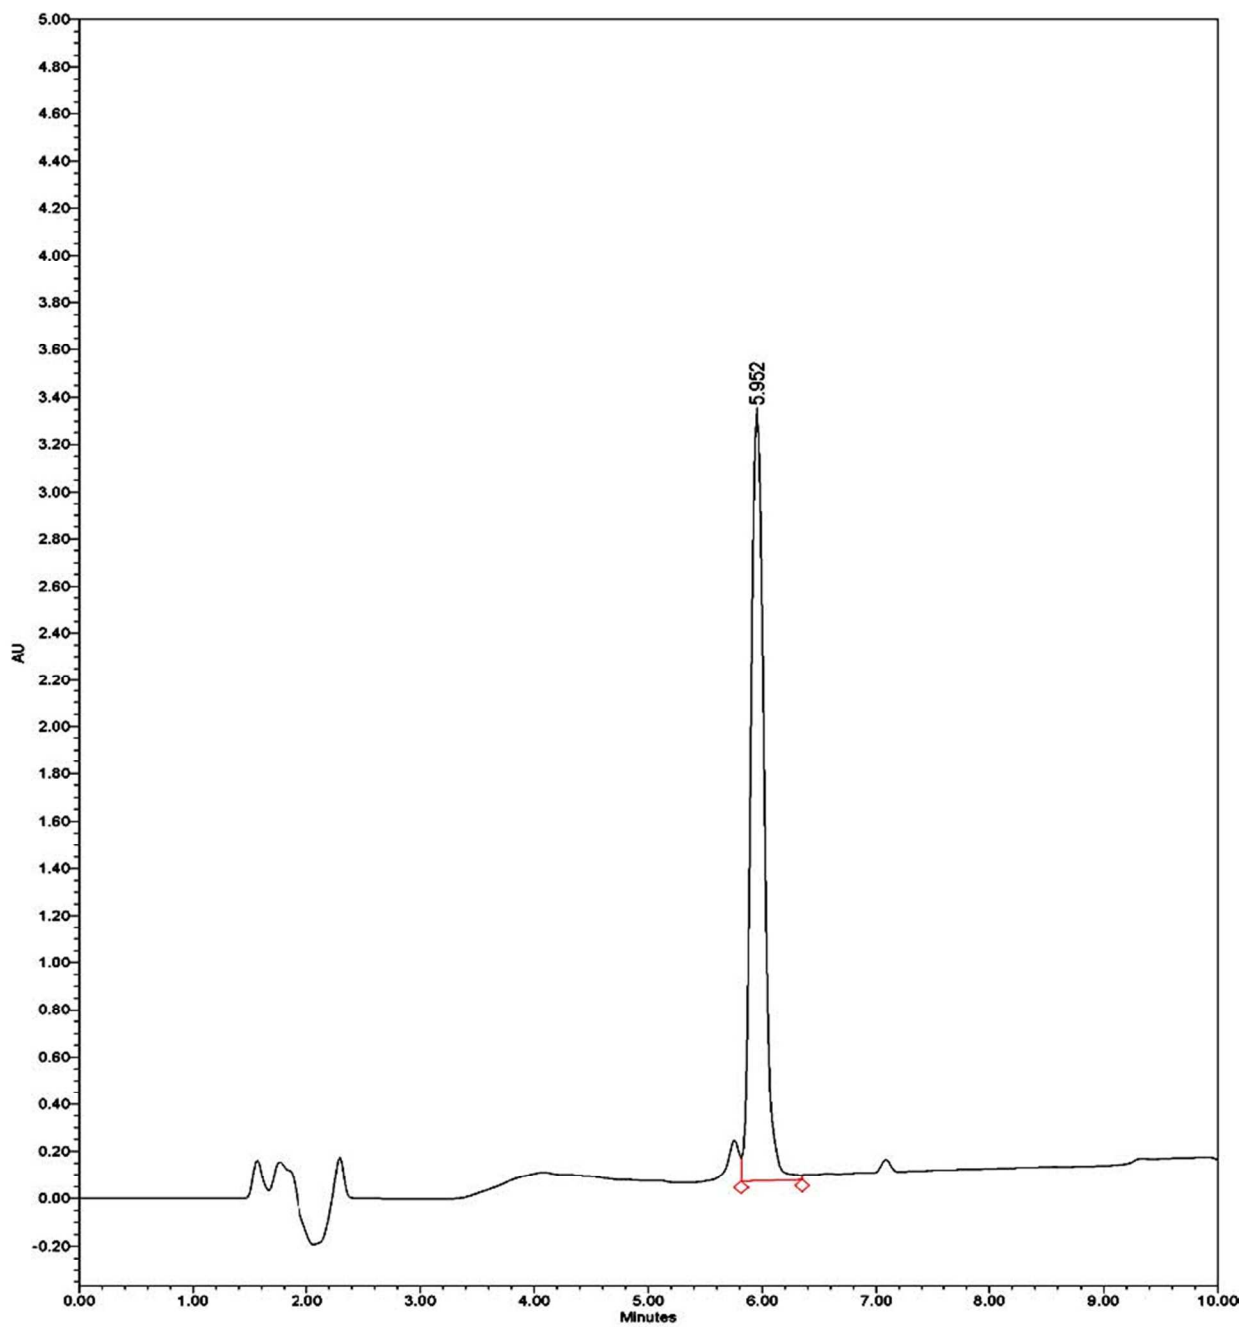

Compound 37

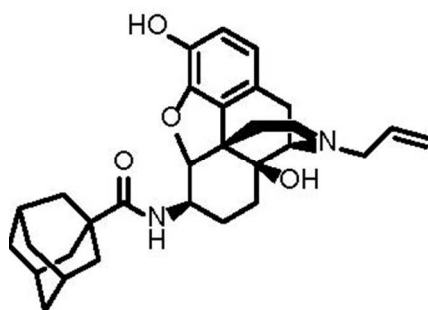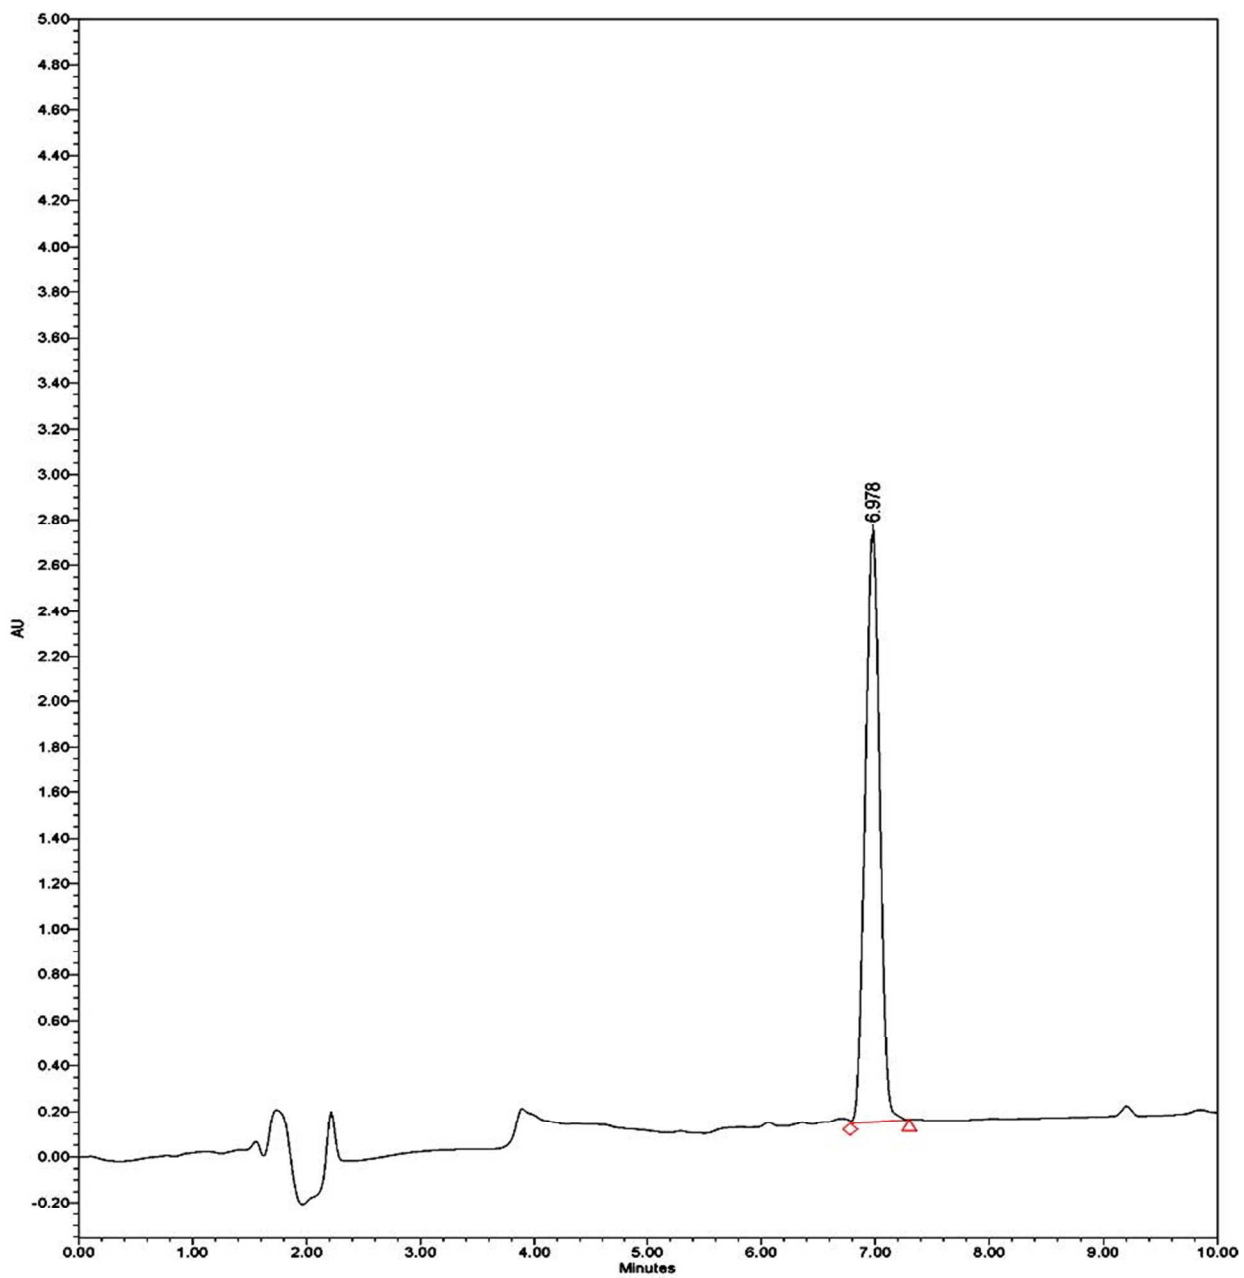



Compound 38

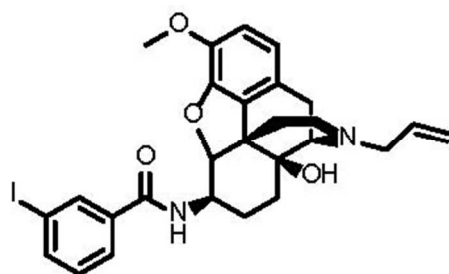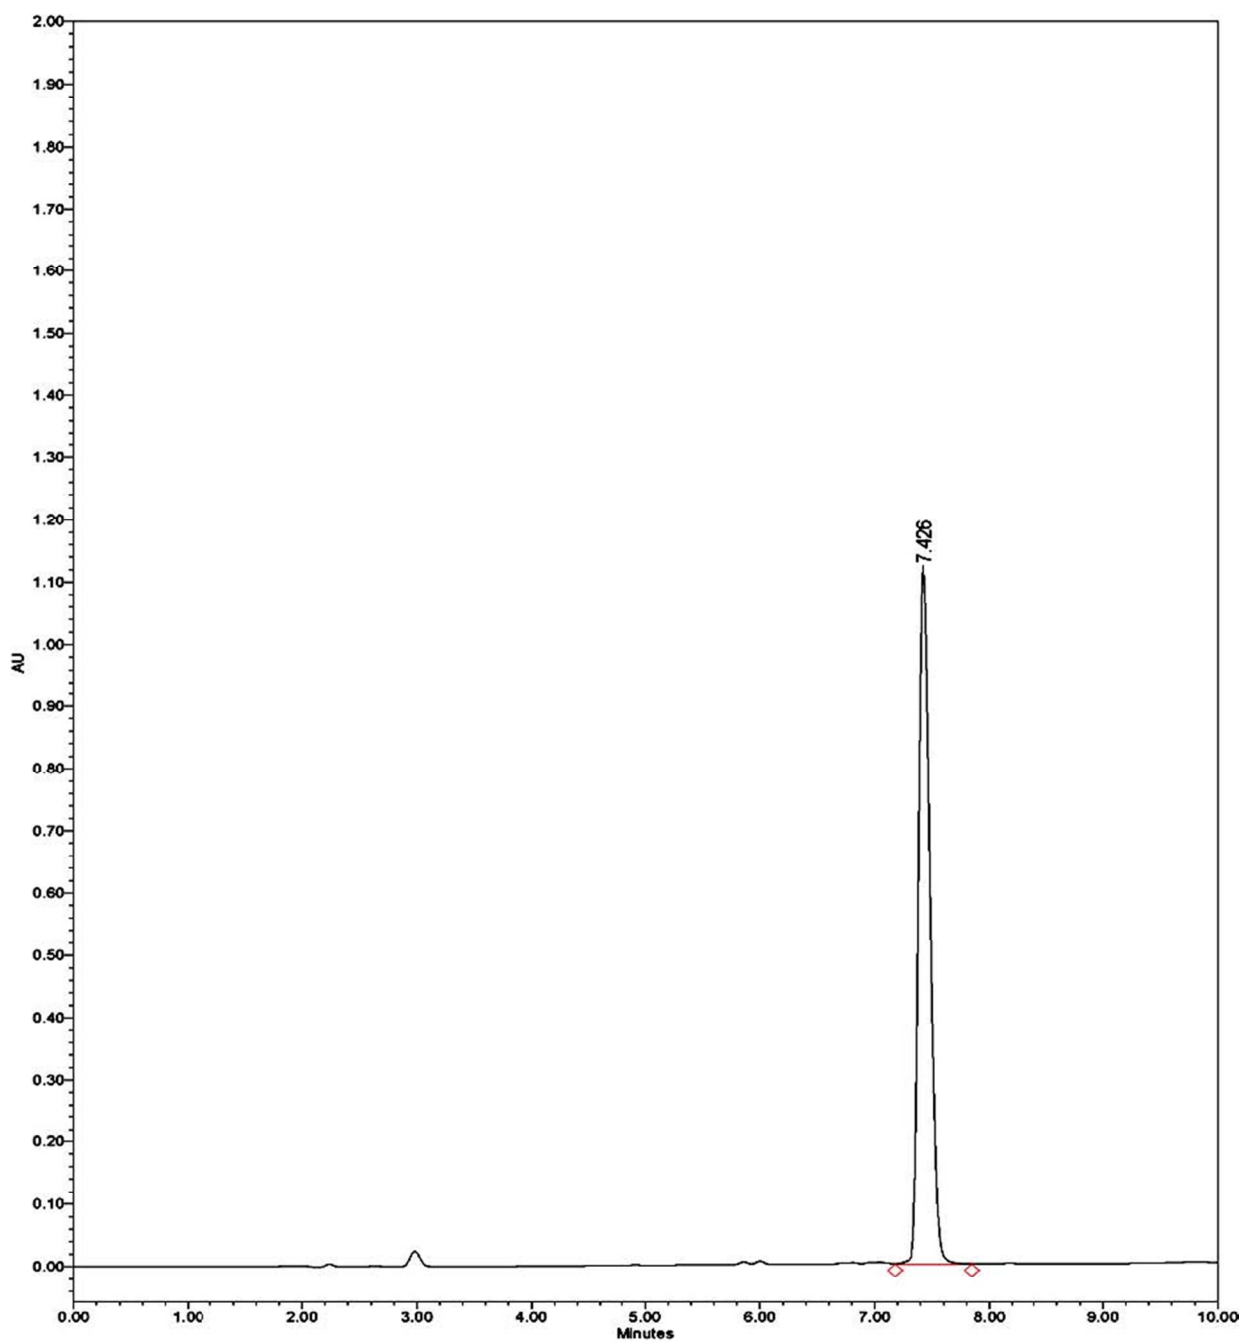

Supplement: NIHMS389808-supplement-1_si_001.pdf [file NIHMS389808-supplement-1_si_001.pdf]
